# Supplementary material for: 2015 Reviewers and Guest Associate Editors
Source: Atypon-hosted journal article supplement (doi:10.1287/mnsc.2016.2423), 2016-02-01
Supplement: mnsc.2016.2423-sm-ec-complete_reviewers_list-feb-2016.pdf [file mnsc.2016.2423-sm-ec-complete_reviewers_list-feb-2016.pdf]

| Reviewer Full Name   | Reviewer Institution                        |
|----------------------|---------------------------------------------|
| Abarbanell, Jeffery  | University of North Carolina at Chapel Hill |
| Abdellaoui, Mohammed | HEC Paris                                   |
| Abeler, Johannes     | University of Oxford                        |
| Abhishek, Vibhanshu  | Carnegie Mellon University                  |
| Acland, Daniel       | University of California, Berkeley          |
| Acquisti, Alessandro | Carnegie Mellon University                  |
| Adams, Christopher   | Federal Trade Commission                    |
| Adams, Renee         | University of New South Wales               |
| Addoum, Jawad        | University of Miami                         |
| Adida, Elodie        | University of California, Riverside         |
| Adjerid, Idris       | University of Notre Dame                    |
| Adler, Nicole        | Hebrew University of Jerusalem              |
| Aflaki, Sam          | HEC Paris                                   |
| Agarwal, Ashish      | University of Texas at Austin               |
| Agarwal, Rajshree    | University of Maryland                      |
| Agarwal, Vikas       | Georgia State University                    |
| Aggarwal, Rajesh     | Northeastern University                     |
| Aggarwal, Rohit      | University of Utah                          |
| Aggarwal, Vikas      | INSEAD                                      |
| Agha, Leila          | Boston University                           |
| Agranov, Marina      | California Institute of Technology          |
| Agrawal, Anup        | University of Alabama                       |
| Agrawal, Anupam      | Texas A&M University                        |
| Agrawal, Ashwini     | New York University                         |
| Agrawal, Vishal      | Georgetown University                       |
| Aguerrevere, Felipe  | University of Alberta                       |
| Aguilera, Ruth       | Northeastern University                     |
| Ahern, Kenneth       | University of Michigan                      |
| Ahmed, Anwer         | Texas A&M University                        |
| Ahn, Michael         | University of Massachusetts Boston          |
| Ai, Hengjie          | University of Minnesota                     |
| Aimone, Jason        | Virginia Tech                               |
| Akan, Mustafa        | Carnegie Mellon University                  |
| Aksin, Zeynep        | Koç University                              |
| Alan, Sule           | University of Essex                         |
| Alan, Yasin          | Vanderbilt University                       |
| Albargli, Elias      | Banco Central de Chile                      |
| Albuquerque, Paulo   | INSEAD                                      |
| Alevy, Jonathan      | University of Alaska                        |
| Alexander, Carol     | University of Sussex                        |
| Ali, Ashiq           | University of Texas at Dallas               |
| Ali, Nageeb          | University of California, San Diego         |
| Alizamir, Saed       | Yale University                             |
| Allcott, Hunt        | New York University                         |
| Alm, James           | Tulane University                           |
| Almaas, Ingviold     | Norwegian School of Economics               |
| Almeida, Caio        | Getulio Vargas Foundation                   |
| Aloise, Daniel       | Universidade Federal do Rio Grande do Norte |

|                         |                                       |
|-------------------------|---------------------------------------|
| Alon, Shiri             | Bar Ilan University                   |
| Alonso, Ricardo         | London School of Economics            |
| Alptekinoglu, Aydin     | Pennsylvania State University         |
| Altmann, Steffen        | University of Copenhagen              |
| Al-Ubaydli, Omar        | George Mason University               |
| Amaldoss, Wilfred       | Duke University                       |
| Ambrose, Brent          | Pennsylvania State University         |
| Ambrus, Attila          | Duke University                       |
| Amel-Zadeh, Amir        | University of Cambridge               |
| Amini, Hamed            | EPFL                                  |
| Amir, On                | University of California, San Diego   |
| Amore, Mario Daniele    | Bocconi University                    |
| Amromin, Gene           | Federal Reserve Bank of Chicago       |
| An, Li                  | Tsinghua University                   |
| Anagol, Santosh         | University of Pennsylvania            |
| Anand, Amber            | Syracuse University                   |
| Andersen, Steffen       | Copenhagen Business School            |
| Anderson, David         | Baruch College                        |
| Anderson, Marc          | Iowa State University                 |
| Andersson, Tobias       | Linkoping University                  |
| Andrade, Sandro         | University of Miami                   |
| Andrei, Daniel          | University of California, Los Angeles |
| Andrews, Michelle       | University of Texas at Arlington      |
| Andritsos, Dimitrios    | HEC Paris                             |
| Angel, James            | Georgetown University                 |
| Angst, Corey            | University of Notre Dame              |
| Anik, Lalin             | Duke University                       |
| Animesh, Animesh        | McGill University                     |
| Anjos, Fernando         | University of Texas at Austin         |
| Anton, Miguel           | IESE Business School                  |
| Antweiler, Werner       | University of British Columbia        |
| Apesteguia, Jose        | Universitat Pompeu Fabra              |
| Arad, Ayala             | Tel Aviv University                   |
| Araman, Victor          | New York University                   |
| Aravindakshan, Ashwin   | University of California, Davis       |
| Arbatskaya, Maria       | Emory University                      |
| Aretz, Kevin            | Manchester Business School            |
| Argyle, Bronson         | Brigham Young University              |
| Aribarg, Anocha         | University of Michigan                |
| Arie, Guy               | University of Rochester               |
| Arif, Slaman            | Indiana University                    |
| Arifoglu, Kenan         | University College London             |
| Arlotto, Alessandro     | Duke University                       |
| Armstrong, Christopher  | University of Pennsylvania            |
| Arozamena, Leandro      | Universidad Torcuato Di Tella         |
| Asamov, Tsvetan         | Princeton University                  |
| Ascarza, Eva            | Columbia University                   |
| Ashbaugh Skaife, Hollis | University of California, Davis       |
| Ashlagi, Itai           | Stanford University                   |

|                          |                                       |
|--------------------------|---------------------------------------|
| Ashton, Lydia            | University of Wisconsin-Madison       |
| Astebro, Thomas          | University of Toronto                 |
| Atanassov, Julian        | University of Oregon                  |
| Atasoy, Hilal            | Temple University                     |
| Atasu, Atalay            | Georgia Institute of Technology       |
| Atkin, David             | Massachusetts Institute of Technology |
| Atmaz, Adem              | London Business School                |
| Audia, Pino              | Dartmouth College                     |
| Augenblick, Ned          | University of California, Berkeley    |
| August, Terrence         | University of California, San Diego   |
| Auster, Sarah            | Bocconi University                    |
| Avci, Buket              | Singapore Management University       |
| Avdis, Efstathios        | University of Alberta                 |
| Aven, Brandy             | Carnegie Mellon University            |
| Axelson, Ulf             | London School of Economics            |
| Aycinena, Diego          | Universidad Francisco Marroquín       |
| Aydin, Goker             | Indiana University                    |
| Ayer, Turgay             | Georgia Institute of Technology       |
| Ayvaci, Mehmet           | University of Texas at Dallas         |
| Azar, Ofer               | Ben-Gurion University of the Negev    |
| Azoulay, Pierre          | Massachusetts Institute of Technology |
| Babenko, Ilona           | Arizona State University              |
| Babus, Ana               | Imperial College London               |
| Bacarra, Mariagiovanna   | Washington University in St. Louis    |
| Bach, Laurent            | Stockholm School of Economics         |
| Badertscher, Brad        | University of Notre Dame              |
| Baele, Lieven            | Tilburg University                    |
| Bagnoli, Mark            | Purdue University                     |
| Bai, Hang                | The Ohio State University             |
| Bai, Jennie              | Georgetown University                 |
| Bai, John                | Northeastern University               |
| Bai, Xue                 | University of Connecticut             |
| Bailey, Warren           | Cornell University                    |
| Baillon, Aurelien        | Erasmus University                    |
| Baird, Aaron             | Georgia State University              |
| Baker, Erin              | University of Massachusetts Amherst   |
| Baker, Scott             | Northwestern University               |
| Baker, Steven            | University of Virginia                |
| Bakshi, Gurdip           | University of Maryland                |
| Bakshi, Nitin            | London Business School                |
| Bala, Hillol             | Indiana University                    |
| Balachander, Subramanian | Purdue University                     |
| Balafoutas, Loukas       | University of Innsbruck               |
| Balakrishnan, Ramji      | University of Iowa                    |
| Baldwin, Carliss         | Harvard University                    |
| Bali, Turan              | Georgetown University                 |
| Balkundi, Prasad         | University at Buffalo                 |
| Ball, George             | Indiana University                    |
| Balseiro, Santiago       | Columbia University                   |

|                                   |                                       |
|-----------------------------------|---------------------------------------|
| Balsmeier, Benjamin               | University of Leuven                  |
| Banal-Estanol, Albert             | Universitat Pompeu Fabra              |
| Bandi, Chaitanya                  | Northwestern University               |
| Bandiera, Oriana                  | London School of Economics            |
| Bandyopadhyay, Subhajyoti (Subho) | University of Florida                 |
| Banerjee, Snehal                  | Northwestern University               |
| Bank, Matthias                    | University of Innsbruck               |
| Bannier, Christina                | Johannes-Gutenberg University Mainz   |
| Bansal, Saurabh                   | Pennsylvania State University         |
| Baptista, Alexandre               | George Washington University          |
| Bar, Talia                        | University of Connecticut             |
| Barankay, Iwan                    | University of Pennsylvania            |
| Barasch, Alixandra                | University of Pennsylvania            |
| Barberis, Nicholas                | Yale University                       |
| Barbosu, Sandra                   | University of Toronto                 |
| Bardhan, Indranil                 | University of Texas at Dallas         |
| Bargeron, Leonce                  | University of Kentucky                |
| Bar-Gill, Sagit                   | Massachusetts Institute of Technology |
| Barnea, Amir                      | HEC Montréal                          |
| Baron, Opher                      | University of Toronto                 |
| Barron, Daniel                    | Northwestern University               |
| Barrot, Jean-Noel                 | Massachusetts Institute of Technology |
| Bartels, Daniel                   | University of Chicago                 |
| Bartling, Björn                   | University of Zurich                  |
| Bartroff, Jay                     | University of Southern California     |
| Barzilay, Ohad                    | Tel Aviv University                   |
| Basker, Emek                      | United States Census Bureau           |
| Bates, David                      | University of Iowa                    |
| Bates, Thomas                     | Arizona State University              |
| Batt, Bob                         | University of Wisconsin-Madison       |
| Battalio, Robert                  | Notre Dame University                 |
| Baucells, Manel                   | University of Virginia                |
| Bauer, Michael                    | Federal Reserve Bank of San Francisco |
| Bauer, Michal                     | Charles University                    |
| Baumann, Oliver                   | University of Southern Denmark        |
| Bavafa, Hessam                    | University of Pennsylvania            |
| Bayati, Mohsen                    | Stanford University                   |
| Bearden, J. Neil                  | INSEAD (Singapore)                    |
| Beckman, Christine                | University of California, Irvine      |
| Beer, Ruth                        | Indiana University                    |
| Begen, Mehmet                     | Western University                    |
| Begley, Taylor                    | London Business School                |
| Bekker, René                      | Vrije Universiteit Amsterdam          |
| Belavina, Elena                   | University of Chicago                 |
| Belenzon, Sharon                  | Duke University                       |
| Belleflamme, Paul                 | Université Catholique de Louvain      |
| Bellemare, Charles                | Université Laval                      |
| Belot, Michele                    | University of Edinburgh               |
| Bena, Jan                         | University of British Columbia        |

|                        |                                                |
|------------------------|------------------------------------------------|
| Bengui, Julien         | University of Montreal                         |
| Benjamin, Daniel       | University of Southern California              |
| Bennett, Victor        | Duke University                                |
| Benoit, Jean-Pierre    | London Business School                         |
| Bens, Daniel           | INSEAD                                         |
| Benson, David          | Brigham Young University                       |
| Berchicci, Luca        | Erasmus University                             |
| Berge, Lars Ivar       | NHH Norwegian School of Economics              |
| Berger, Allen          | University of South Carolina                   |
| Berger, Jonah          | University of Pennsylvania                     |
| Berger, Loic           | Fondazione Eni Enrico Mattei                   |
| Berger, Sebastian      | University of Bern                             |
| Bergman, Nittai        | Massachusetts Institute of Technology          |
| Bergstresser, Daniel   | Brandeis University                            |
| Berkowitz, Jeremy      | University of Houston                          |
| Berman, Ron            | University of Pennsylvania                     |
| Bernard, Carole        | University of Waterloo                         |
| Bernstein, Ethan       | Harvard University                             |
| Bernstein, Shai        | Stanford University                            |
| Berri, David           | Southern Utah University                       |
| Berry Jaeker, Jillian  | Boston University                              |
| Bertomeu, Jeremy       | Baruch College                                 |
| Besbes, Omar           | Columbia University                            |
| Beshears, John         | Stanford University                            |
| Beyer, Anne            | Stanford University                            |
| Bhagat, Sanjai         | University of Colorado                         |
| Bharath, Sreedhar      | Arizona State University                       |
| Bhardwaj, Pradeep      | University of Central Florida                  |
| Bhargava, Saurabh      | Carnegie Mellon University                     |
| Bhattacharjee, Sudip   | University of Connecticut                      |
| Bhattacharya, Shantanu | INSEAD                                         |
| Bhattacharya, Utpal    | Hong Kong University of Science and Technology |
| Bhattacharjee, Anol    | University of South Florida                    |
| Bhojraj, Sanjeev       | Cornell University                             |
| Bianchi, Emily         | Emory University                               |
| Bichler, Martin        | Technische Universität München                 |
| Bigoni, Maria          | University of Bologna                          |
| Bikard, Michael        | London Business School                         |
| Billett, Matthew       | Indiana University                             |
| Billinger, Stephan     | University of Southern Denmark                 |
| Billio, Monica         | Università Ca' Foscari di Venezia              |
| Bimpikis, Kostas       | Stanford University                            |
| Birch, Stephen         | CHEPA                                          |
| Birkinshaw, Julian     | London Business School                         |
| Biro, Peter            | Hungarian Academy of Sciences                  |
| Birru, Justin          | The Ohio State University                      |
| Biyalogorsky, Eyal     | IDC Herzliya                                   |
| Bjorvatn, Kjetil       | NHH Norwegian School of Economics              |
| Black, Lamont          | DePaul University                              |

|                        |                                         |
|------------------------|-----------------------------------------|
| Blair, Peter           | University of Pennsylvania              |
| Blanes i Vidal, Jordi  | London School of Economics              |
| Blau, Benjamin         | Utah State University                   |
| Blit, Joel             | George Washington University            |
| Blocher, Jesse         | Vanderbilt University                   |
| Bloom, Nicholas        | Stanford University                     |
| Bloomfield, Rob        | Cornell University                      |
| Bockstedt, Jesse       | University of Arizona                   |
| Bodnaruk, Andriy       | University of Notre Dame                |
| Bodur, Merve           | Georgia Institute of Technology         |
| Boguth, Oliver         | Arizona State University                |
| Bol, Jasmijn           | Tulane University                       |
| Bollen, Nicolas        | Vanderbilt University                   |
| Bollinger, Bryan       | Duke University                         |
| Bolton, Gary           | University of Texas at Dallas           |
| Bonaccio, Silvia       | University of Ottawa                    |
| Bonatti, Alessandro    | Massachusetts Institute of Technology   |
| Bond, Philipp          | University of Washington                |
| Bongaerts, Dion        | Erasmus University                      |
| Bonn, Caroline         | MCI Management Center Innsbruck         |
| Bonsall, Samuel        | The Ohio State University               |
| Boone, Audra           | U.S. Securities and Exchange Commission |
| Borah, Abhishek        | University of Washington                |
| Bordalo, Pedro         | Royal Holloway University of London     |
| borisov, alexander     | University of Cincinnati                |
| Borkovsky, Ron         | University of Toronto                   |
| Borst, Sem             | Eindhoven University of Technology      |
| Boschini, Anne         | Linköping University                    |
| Bottazzi, Laura        | Bologna University and IGER             |
| Boudreau, Kevin        | London Business School                  |
| Boulatov, Alex         | National Research University            |
| Boulu-Reshef, Béatrice | University of Virginia                  |
| Bouvard, Matthieu      | McGill University                       |
| Bouwens, Jan           | University of Amsterdam                 |
| Bowers, Anne           | University of Toronto                   |
| Boyabatli, Onur        | Singapore Management University         |
| Boyaci, Tamer          | McGill University                       |
| Boyarchenko, Nina      | Federal Reserve Bank of New York        |
| Boyer, Brian           | Brigham Young University                |
| Bracha, Anat           | Federal Reserve Bank of Boston          |
| Bradley, Daniel        | University of South Florida             |
| Brams, Steven          | New York University                     |
| Brandon, Alec          | University of Chicago                   |
| Brands, Raina          | London Business School                  |
| Brandts, Jordi         | Barcelona Graduate School of Economics  |
| Braun, Michael         | Southern Methodist University           |
| Bray, Robert           | Stanford University                     |
| Brenner, Lyle          | University of Florida                   |
| Breon-Drish, Bradyn    | Stanford University                     |

|                          |                                                  |
|--------------------------|--------------------------------------------------|
| Bridwell-Mitchell, Ebony | Harvard University                               |
| Brochet, Francois        | Boston University                                |
| Brock, Michelle          | European Bank for Reconstruction and Development |
| Brockman, Paul           | Lehigh University                                |
| Brogaard, Jonathan       | University of Washington                         |
| Broomell, Stephen        | Carnegie Mellon University                       |
| Brosig-Koch, Jeannette   | University of Duisburg-Essen                     |
| Brown, Alexander         | Texas A&M University                             |
| Brown, David             | Duke University                                  |
| Brown, Jennifer          | Northwestern University                          |
| Bruche, Max              | City University London                           |
| Bruckner, Markus         | University of Queensland                         |
| Bruhin, Adrian           | University of Lausanne                           |
| Bruhn, Miriam            | The World Bank                                   |
| Brunner, Johann          | University of Linz                               |
| Bruno, Valentina         | American University                              |
| Bryan, Kevin             | University of Toronto                            |
| Bryzgalova, Svetlana     | London School of Economics                       |
| Budescu, David           | Fordham University                               |
| Buell, Ryan              | Harvard University                               |
| Bulte, Erwin             | Wageningen University                            |
| Bundy, Jonathan          | Pennsylvania State University                    |
| Burks, Stephen           | University of Minnesota, Morris                  |
| Burris, Ethan            | University of Texas at Austin                    |
| Burson, Katherine        | University of Michigan                           |
| Burt, Aaron              | University of Washington                         |
| Burtch, Gordon           | University of Minnesota                          |
| Busemeyer, Jerome        | Indiana University                               |
| Buser, Thomas            | University of Amsterdam                          |
| Buskens, Vincent         | Utrecht University                               |
| Busse, Meghan            | Northwestern University                          |
| Butler, David            | Murdoch University                               |
| Cacchiani, Valentina     | University of Bologna                            |
| Cadman, Brian            | University of Utah                               |
| Cai, Gangshu             | Santa Clara University                           |
| Cai, Jay                 | Drexel University                                |
| Cai, Jie                 | Drexel University                                |
| Cain, Daylian            | Yale University                                  |
| Calmon, Andre            | INSEAD                                           |
| Calvano, Emilio          | University of Naples                             |
| Calzolari, Giacomo       | University of Bologna                            |
| Camilleri, Adrian        | Royal Melbourne Institute of Technology          |
| Campbell, Benjamin       | The Ohio State University                        |
| Campbell, Dennis         | Harvard University                               |
| Candogan, Ozan           | University of Chicago                            |
| Cantor, David            | Iowa State University                            |
| Cao, Ying                | Chinese University of Hong Kong                  |
| Caplin, Andrew           | New York University                              |
| Cappelen, Alexander      | NHH Norwegian School of Economics                |

|                          |                                        |
|--------------------------|----------------------------------------|
| Capponi, Agostino        | Columbia University                    |
| Carlsson, John           | University of Southern California      |
| Carnabuci, Gianluca      | University of Lugano                   |
| Carnahan, Seth           | University of Maryland                 |
| Caro, Felipe             | University of California, Los Angeles  |
| Caroli, Eve              | Université Paris Dauphine              |
| Carre, Justin            | Nipissing University                   |
| Carrillo, Juan           | University of Southern California      |
| Carroll, Christopher     | Johns Hopkins University               |
| Carroll, Glenn           | Stanford University                    |
| Carson, Stephen          | University of Utah                     |
| Carter, Mary             | Boston College                         |
| Carter, Mary Ellen       | Boston College                         |
| Casas Arce, Pablo        | Arizona State University               |
| Casey, Katherine         | Stanford University                    |
| Caskey, Judson           | University of California, Los Angeles  |
| Castillo, Marco          | George Mason University                |
| Catalini, Christian      | Massachusetts Institute of Technology  |
| Cattani, Gino            | New York University                    |
| Cavagnaro, Daniel        | California State University, Fullerton |
| Cavusoglu, Hasan         | University of British Columbia         |
| Cenesizoglu, Tolga       | HEC Montréal                           |
| Cenfetelli, Ronald       | University of British Columbia         |
| Centola, Damon           | University of Pennsylvania             |
| Cerreia-Vioglio, Simone  | Bocconi University                     |
| Cesarini, David          | New York University                    |
| Cespa, Giovanni          | City University London                 |
| Chabakauri, Georgy       | London School of Economics             |
| Chabi-Yo, Fousseni       | Ohio State University                  |
| Chakraborty, Archishman  | Yeshiva University                     |
| Chakravarty, Anindita    | University of Georgia                  |
| Chan, Carri              | Columbia University                    |
| Chan, Jason              | University of Minnesota                |
| Chan, Ron                | University of Manchester               |
| Chan, Tat                | Washington University in St. Louis     |
| Chandukala, Sandeep      | Singapore Management University        |
| Chang, Sea-Jin           | National University of Singapore       |
| Chang, Tom               | University of Southern California      |
| Chan-Serafin, Suzanne    | University of New South Wales          |
| Chao, Matthew            | California Institute of Technology     |
| Chao, Raul               | University of Virginia                 |
| Chapman, Gretchen        | Rutgers University                     |
| Chatain, Olivier         | HEC Paris                              |
| Chateauneuf, Alain       | Université de Paris1                   |
| Chaturvedi, Aadhaar      | Université de Namur                    |
| Chava, Sudheer           | Georgia Institute of Technology        |
| Chavez-Demoulin, Valerie | University of Lausanne                 |
| Che, Hai                 | Indiana University                     |
| Chen, Bin                | University of Rochester                |

|                    |                                                |
|--------------------|------------------------------------------------|
| Chen, David        | University of Minnesota                        |
| Chen, Frank        | Chinese University of Hong Kong                |
| Chen, Guoli        | INSEAD                                         |
| Chen, Hailiang     | City University of Hong Kong                   |
| Chen, Hua          | University of Mississippi                      |
| Chen, Huaizhi      | London School of Economics                     |
| Chen, Jianqing     | University of Texas at Dallas                  |
| Chen, Jiawei       | University of California, Irvine               |
| Chen, Jing         | Copenhagen Business School                     |
| Chen, Joseph       | University of California, Davis                |
| Chen, Kay-Yut      | University of Texas at Arlington               |
| Chen, Li           | Cornell University                             |
| Chen, Li-Wei       | Emory University                               |
| Chen, Liwen        | City University of Hong Kong                   |
| Chen, Nan          | Chinese University of Hong Kong                |
| Chen, Rachel       | University of California, Davis                |
| Chen, Ren-Raw      | Fordham University                             |
| Chen, Shiu-Sheng   | National Taiwan University                     |
| Chen, Shuping      | University of Texas at Austin                  |
| Chen, Wei          | University of California, San Diego            |
| Chen, Xia          | Singapore Management University                |
| Chen, Xin          | University of Illinois at Urbana-Champaign     |
| Chen, Xinlei       | Cheung Kong Graduate School of Business        |
| Chen, Ying-Ju      | Hong Kong University of Science and Technology |
| Chen, Yong         | Texas A&M University                           |
| Chen, Yongmin      | University of Colorado                         |
| Chen, Zhaohui      | University of Virginia                         |
| Chen, Zhi-Long     | University of Maryland                         |
| Chen, Zhiyao       | University of Reading                          |
| Cheng, Ing-Haw     | Dartmouth College                              |
| Cheng, Qiang       | Singapore Management University                |
| Cheng, Shijun      | University of Maryland                         |
| Cheng, Zhuo (June) | Hong Kong Polytechnic University               |
| Chernenko, Sergey  | The Ohio State University                      |
| Cheyne, Edwige     | Columbia University                            |
| Chi, Yeguang       | Shanghai Advanced Institute of Finance         |
| Chiang, Roger      | University of Cincinnati                       |
| Chick, Stephen     | INSEAD                                         |
| Chinco, Alex       | University of Illinois at Urbana-Champaign     |
| Ching, Andrew      | University of Toronto                          |
| Chiou, Lesley      | Occidental College                             |
| Chioveanu, Ioana   | Brunel University                              |
| Chircu, Alina      | Bentley University                             |
| Chiu, W. Henry     | University of Manchester                       |
| Cho, Soo-Haeng     | Carnegie Mellon University                     |
| Chod, Jiri         | Boston College                                 |
| Choi, Jaewon       | University of Illinois at Urbana-Champaign     |
| Choi, James        | Yale University                                |
| Choi, Syngjoo      | University College London                      |

|                        |                                             |
|------------------------|---------------------------------------------|
| Choi, Willie           | University of Pittsburgh                    |
| Chou, Eileen           | University of Virginia                      |
| Choudhary, Vidyanand   | University of California, Irvine            |
| Choudhury, Prithwiraj  | Harvard University                          |
| Christensen, Hans      | University of Chicago                       |
| Christian, Michael     | University of North Carolina at Chapel Hill |
| Christoffersen, Peter  | University of Toronto                       |
| Christoffersen, Susan  | University of Toronto                       |
| Chu, Junhong           | National University of Singapore            |
| Chu, Leon              | University of Southern California           |
| Chu, Yongqiang         | University of South Carolina                |
| Chugh, Dolly           | New York University                         |
| Chui, Andy             | Hong Kong Polytechnic University            |
| Chung, Janne           | York University                             |
| Chung, Kevin           | University of Wisconsin-Madison             |
| Chung, Wilbur          | University of Maryland                      |
| Cicala, Steve          | University of Chicago                       |
| Cici, Gjergji          | College of William and Mary                 |
| Cil, Eren              | University of Oregon                        |
| Cillo, Alessandra      | Bocconi University                          |
| Ciocan, Florin         | Massachusetts Institute of Technology       |
| Cipriano, Lauren       | University of Western Ontario               |
| Clark, Jonathan        | Pennsylvania State University               |
| Clark, Robert          | HEC Montréal                                |
| Clarkson, Peter        | University of Queensland                    |
| Claussen, Jörg         | Copenhagen Business School                  |
| Clement, Michael       | University of Texas at Austin               |
| Coates, Jon            | Cambridge University                        |
| Cobb, Adam             | University of Pennsylvania                  |
| Coffman, Katherine     | The Ohio State University                   |
| Coffman, Lucas         | The Ohio State University                   |
| Cohen, Daniel          | University of Texas at Dallas               |
| Cohen, Taya            | Carnegie Mellon University                  |
| Cohen, Wes             | Duke University                             |
| Cohen-Charash, Yochi   | Baruch College                              |
| Cohen-Vernik, Dinah    | Rice University                             |
| Cohn, Alain            | University of Chicago                       |
| Cohn, Jonathan         | University of Texas at Austin               |
| Cole, Matthew          | University of Birmingham                    |
| Coles, Jeff            | Arizona State University                    |
| Collins, Christopher   | Cornell University                          |
| Comerton-Forde, Carole | University of Melbourne                     |
| Conklin, James         | University of Georgia                       |
| Conlin, Michael        | Michigan State University                   |
| Conlon, Chris          | Columbia University                         |
| Connolly, Terry        | University of Arizona                       |
| Conti, Annamaria       | Georgia Institute of Technology             |
| Conyon, Martin         | University of Pennsylvania                  |
| Cookson, J. Anthony    | University of Colorado at Boulder           |

|                     |                                              |
|---------------------|----------------------------------------------|
| Cooper, Michael     | University of Utah                           |
| Cooper, Ryan        | Washington University in St. Louis           |
| Cooper, William     | University of Minnesota                      |
| Corgnet, Brice      | Chapman University                           |
| Cornaggia, Jess     | Georgetown University                        |
| Cornaggia, Kimberly | American University                          |
| Corredoira, Rafael  | The Ohio State University                    |
| Cortes, Felipe      | Northeastern University                      |
| Costello, Anna      | Massachusetts Institute of Technology        |
| Cowgill, Bo         | University of California, Berkeley           |
| Cox Pahnke, Emily   | University of Washington                     |
| Crama, Pascale      | Singapore Management University              |
| Crawford, Vincent   | University of California, San Diego          |
| Crawley, Mike       | Indiana University                           |
| Cremers, Martijn    | University of Notre Dame                     |
| Crilly, Donal       | London Business School                       |
| Critcher, Clayton   | University of California, Berkeley           |
| Cronin, Matthew     | George Mason University                      |
| Cronqvist, Henrik   | University of Miami                          |
| Cryder, Cynthia     | Washington University in St. Louis           |
| Csaszar, Felipe     | University of Michigan                       |
| Cui, Ruomeng        | Indiana University                           |
| Cui, Shiliang       | Georgetown University                        |
| Cui, Tony           | University of Minnesota                      |
| Cui, Yao            | Cornell University                           |
| Cumming, Douglas    | York University                              |
| Cummings, Jonathon  | Duke University                              |
| Cunat, Vicente      | London School of Economics                   |
| Cunha, Igor         | Nova School of Business and Economics        |
| Cunha, Marcus       | University of Georgia                        |
| Cunningham, Tom     | Institute for International Economic Studies |
| Cuny, Christine     | New York University                          |
| Curtis, Asher       | University of Washington                     |
| Custodio, Claudia   | Nova School of Business and Economics        |
| Cvitancic, Jaksza   | California Institute of Technology           |
| Da, Zhi             | University of Notre Dame                     |
| Da Rin, Marco       | Tilburg University                           |
| Dada, Maqbool       | Johns Hopkins University                     |
| Dahl, Michael S.    | Aarhus University                            |
| Dahlin, Kristina    | HEC Paris                                    |
| Dai, Hengchen       | University of Pennsylvania                   |
| Dai, Junyi          | Max Planck Institute for Human Development   |
| Dai, Min            | National University of Singapore             |
| Dai, Na             | University at Albany                         |
| Dai, Tinglong       | Johns Hopkins University                     |
| Dai, Zhonglan       | University of Texas at Dallas                |
| Daigneault, Adam    | Landcare Research NZ                         |
| Daley, Brendan      | Duke University                              |
| Daljord, Oystein    | University of Chicago                        |

|                             |                                                 |
|-----------------------------|-------------------------------------------------|
| Dalton, Patricio            | Tilburg University                              |
| Dana, James                 | Northeastern University                         |
| Dana, Jason                 | Yale University                                 |
| Danaher, Brett              | University of Pennsylvania                      |
| Dang, Tri Vi                | Columbia University                             |
| Daniel, Naveen              | Drexel University                               |
| Danis, Andras               | Georgia Institute of Technology                 |
| Darrough, Masako            | Baruch College                                  |
| Das, Sanjiv                 | Santa Clara University                          |
| Das, Somnath                | University of Illinois at Chicago               |
| Dasgupta, Amil              | London School of Economics                      |
| Dasgupta, Sudipto           | Lancaster University                            |
| Dass, Nishant               | Georgia Institute of Technology                 |
| David, Alexander            | University of Calgary                           |
| Davidoff, Thomas            | University of British Columbia                  |
| Davies, Ryan                | Babson College                                  |
| Davis, Andrew               | Cornell University                              |
| Davis, Lucas                | University of California, Berkeley              |
| Davydenko, Sergei           | University of Toronto                           |
| Dawande, Milind             | University of Texas at Dallas                   |
| Dawar, Niraj                | University of Western Ontario                   |
| Day, Robert                 | University of Connecticut                       |
| de Bettignies, Jean-Etienne | Queen's University                              |
| de Franco, Gus              | University of Toronto                           |
| De Giorgi, Enrico           | University of St. Gallen                        |
| de Haan, Thomas             | University of Stirling                          |
| de la Rosa, Leonidas        | Aarhus University                               |
| de los Santos, Babur        | Clemson University                              |
| de Meza, David              | London School of Economics                      |
| de Motta, Adolfo            | McGill University                               |
| de Quidt, Jon               | Stockholm University                            |
| de Rassenfosse, Gaétan      | École Polytechnique Fédérale de Lausanne (EPFL) |
| de Roon, Frans              | Tilburg University                              |
| Dean, Mark                  | Brown University                                |
| Deaves, Richard             | McMaster University                             |
| Debo, Laurens               | Dartmouth College                               |
| Decarolis, Francesco        | Boston University                               |
| Dechenaux, Emmanuel         | Kent State University                           |
| DeCroix, Gregory            | University of Wisconsin--Madison                |
| Dekker, Henri               | Vrije Universiteit Amsterdam                    |
| Del Guercio, Diane          | University of Oregon                            |
| Deleersnyder, Barbara       | Tilburg University                              |
| Delfgaauw, Josse            | Erasmus University                              |
| Delgado, Mercedes           | Temple University                               |
| Demange, Gabrielle          | EHESS                                           |
| Demerjian, Peter            | University of Washington                        |
| DeMiguel, Victor            | London Business School                          |
| Demirci, Irem               | University of Mannheim                          |
| Dencker, John               | Northeastern University                         |

|                     |                                               |
|---------------------|-----------------------------------------------|
| Denrell, Jerker     | Oxford University                             |
| Denton, Brian       | North Carolina State University               |
| Denuit, Michel      | Université Catholique de Louvain              |
| Deo, Sarang         | Indian School of Business                     |
| Derdenger, Timothy  | Carnegie Mellon University                    |
| Deryugina, Tatyana  | University of Illinois at Urbana-Champaign    |
| Desai, Hemang       | Singapore Management University               |
| Devalkar, Sripad    | Indian School of Business                     |
| Devetag, Giovanna   | LUISS                                         |
| DeVoe, Sanford      | University of California, Los Angeles         |
| Dew-Becker, Ian     | Northwestern University                       |
| Dezsö, Cristian     | University of Maryland                        |
| Dhaliwal, Dan       | University of Arizona                         |
| Di Maggio, Marco    | Columbia University                           |
| Dickinson, Victoria | University of Mississippi                     |
| Dick-Nielsen, Jens  | Copenhagen Business School                    |
| Diecidue, Enrico    | INSEAD                                        |
| Diekmann, Kristina  | University of Utah                            |
| Dikolli, Shane      | Duke University                               |
| Dimmock, Stephen    | Nanyang Technological University              |
| Dimoka, Angelika    | Temple University                             |
| Dimotakis, Nikos    | Georgia State University                      |
| Dinc, Serdar        | Rutgers University                            |
| Ding, Qing          | Huazhong University of Science and Technology |
| Ding, Yichuan       | University of British Columbia                |
| Dittmar, Robert     | University of Michigan                        |
| Dohmen, Thomas      | University of Bonn                            |
| Doidge, Craig       | University of Toronto                         |
| Dokko, Gina         | University of California, Davis               |
| Dominiak, Adam      | Virginia Tech                                 |
| Donaldson, Jason    | Washington University in St. Louis            |
| Donangelo, Andres   | University of Texas at Austin                 |
| Donelson, Dain      | University of Texas at Austin                 |
| Donkers, Bas        | Erasmus University                            |
| Dorobantu, Sinziana | New York University                           |
| Dou, Yifan          | Fudan University                              |
| Dou, Yiwei          | New York University                           |
| Dowell, Glen        | Cornell University                            |
| Draca, Mirko        | Warwick University                            |
| Draganska, Michaela | Drexel University                             |
| Drake, David        | INSEAD                                        |
| Drake, Michael      | Brigham Young University                      |
| Drechsler, Itamar   | New York University                           |
| Driessen, Joost     | Tilburg University                            |
| driscoll, john      | Federal Reserve Board                         |
| Du, Donglei         | University of New Brunswick                   |
| Du, Du              | City University of Hong Kong                  |
| Du, Kui             | University of Massachusetts Boston            |
| Du, Qianqian        | Shanghai Jiao Tong University                 |

|                     |                                                    |
|---------------------|----------------------------------------------------|
| Du, Rex             | University of Houston                              |
| Duan, Jason         | University of Texas at Austin                      |
| Duan, Wenjing       | George Washington University                       |
| Duellman, Scott     | Saint Louis University                             |
| Duersch, Peter      | University of Heidelberg                           |
| Duffy, John         | University of California, Irvine                   |
| Dufwenberg, Martin  | University of Arizona                              |
| Dugar, Subhasish    | University of Calgary                              |
| Dukes, Anthony      | University of Southern California                  |
| Dunn, Brian         | University of Oklahoma                             |
| Dur, Robert         | Erasmus University                                 |
| Durante, Kristina   | University of Texas at San Antonio                 |
| Durnev, Artem       | University of Iowa                                 |
| Dwenger, Nadja      | University of Hohenheim                            |
| Dyreg, Scott        | Duke University                                    |
| Ebert, Sabastian    | Tilburg University                                 |
| Eckbo, Espen        | Dartmouth College                                  |
| Eckel, Catherine    | Texas A&M University                               |
| Eckhardt, Andreas   | German Graduate School of Management and Law (GGS) |
| Eckles, Dean        | Facebook                                           |
| Edelen, Roger       | University of California, Davis                    |
| Edelman, Benjamin   | Harvard University                                 |
| Ederer, Florian     | Yale University                                    |
| Edmans, Alex        | University of Pennsylvania                         |
| Eesley, Charles     | Stanford University                                |
| Eggers, J.P.        | New York University                                |
| Eil, David          | George Mason University                            |
| Eiling, Esther      | University of Amsterdam                            |
| Ekström, Mathias    | Norwegian School of Economics                      |
| Elbanna, Amany      | Royal Holloway University of London                |
| Ellickson, Paul     | University of Rochester                            |
| Ellingsen, Tore     | Stockholm School of Economics                      |
| Elliott, Marc       | RAND Corporation                                   |
| Ellison, Sara       | Massachusetts Institute of Technology              |
| Elmaghraby, Wedad   | University of Maryland                             |
| Emadi, Seyed M.     | University of North Carolina at Chapel Hill        |
| Embrey, Matthew     | Maastricht University                              |
| Eraker, Bjorn       | University of Wisconsin--Madison                   |
| Erat, Sanjiv        | University of California, San Diego                |
| Erel, Isil          | The Ohio State University                          |
| Erenay, Fatih       | University of Waterloo                             |
| Erhun, Feryal       | Stanford University                                |
| Ericson, Keith      | Boston University                                  |
| Ericsson, Jan       | McGill University                                  |
| Erikson, Emily      | Yale University                                    |
| Eriksson, Katherine | California Polytechnic State University            |
| Eriksson, Kimmo     | Mälardalen University                              |
| Erkens, David       | University of Southern California                  |
| Ermolov, Andrey     | Fordham University                                 |

|                             |                                            |
|-----------------------------|--------------------------------------------|
| Erner, Carsten              | University of California, Los Angeles      |
| Ert, Eyal                   | Hebrew University of Jerusalem             |
| Ertac, Seda                 | Koç University                             |
| Ertimur, Yonca              | University of Colorado at Boulder          |
| Esenduran, Gökçe            | Ohio State University                      |
| Esteves-Sorenson, Constanca | Yale University                            |
| Evans, James                | University of Chicago                      |
| Evans, John                 | University of Pittsburgh                   |
| Evans, Richard              | University of Virginia                     |
| Even-Tov, Omri              | University of California, Berkeley         |
| Evers, Ellen                | University of California, Berkeley         |
| Evgeniou, Theodoros         | INSEAD                                     |
| Ewens, Michael              | Carnegie Mellon University                 |
| Ewerhart, Christian         | University of Zurich                       |
| Exley, Christine            | Harvard University                         |
| Fabrizio, Kira              | Boston University                          |
| Fan, Qintao                 | University of Illinois at Urbana-Champaign |
| Fan, Ying                   | University of Michigan                     |
| Fang, Lily                  | INSEAD                                     |
| Fang, Vivian                | University of Minnesota                    |
| Fang, Xiao                  | University of Delaware                     |
| Fang, Xin                   | Singapore Management University            |
| Fang, Yulin                 | City University of Hong Kong               |
| Farboodi, Mayram            | Princeton University                       |
| Faro, David                 | London Business School                     |
| Faro, José Heleno           | Universidade Federal de Minas Gerais       |
| Farre-Mensa, Joan           | Harvard University                         |
| Fatas, Enrique              | University of East Anglia                  |
| Favilukis, Jack             | London School of Economics                 |
| Fay, Scott                  | Syracuse University                        |
| Featherstone, Clayton       | University of Pennsylvania                 |
| Fehr-Duda, Helga            | ETH Zurich                                 |
| Feiler, Daniel              | Dartmouth College                          |
| Feldhutter, Peter           | London Business School                     |
| Feldman, Emilie             | University of Pennsylvania                 |
| Feldman, Pnina              | University of California, Berkeley         |
| Feng, Felix                 | University of Notre Dame                   |
| Feng, Juan                  | City University of Hong Kong               |
| Feng, Liming                | University of Illinois at Urbana-Champaign |
| Feng, Qi                    | Purdue University                          |
| Ferguson, John-Paul         | Stanford University                        |
| Ferguson, Michael           | University of Cincinnati                   |
| Feri, Francesco             | Royal Holloway University of London        |
| Fernbach, Philip            | University of Colorado                     |
| Ferraro, Domenico           | Arizona State University                   |
| Ferreira, Daniel            | London School of Economics                 |
| Ferreira, Kris              | Harvard University                         |
| Ferreira, Miguel            | Nova School of Business and Economics      |
| Ferreira, Pedro             | Carnegie Mellon University                 |

|                          |                                             |
|--------------------------|---------------------------------------------|
| Ferrer, Rosa             | Universitat Pompeu Fabra                    |
| Ferri, Fabrizio          | Columbia University                         |
| Fiedler, Klaus           | University of Heidelberg                    |
| Filipovic, Damir         | EPFL and Swiss Finance Institute            |
| Filippin, Antonio        | University of Milan                         |
| Finlay, William          | University of Georgia                       |
| Fioretti, Guido          | University of Bologna                       |
| Fischer, Marcel          | Copenhagen Business School                  |
| Fishbach, Ayelet         | University of Chicago                       |
| Fisher, Geoffrey         | California Institute of Technology          |
| Fisher, James            | University of Arizona                       |
| Fisman, Raymond          | Columbia University                         |
| Fjesme, Sturla           | University of Melbourne                     |
| Flammer, Caroline        | University of Western Ontario               |
| Fleischhacker, Adam      | University of Delaware                      |
| Fleming, Lee             | University of California, Berkeley          |
| Floyd, Eric              | Rice University                             |
| Folta, Timothy           | University of Connecticut                   |
| Fong, Christina          | Carnegie Mellon University                  |
| Fong, Duncan             | Pennsylvania State University               |
| Fong, Nathan             | Temple University                           |
| Fonseca, Miguel          | University of Exeter                        |
| Fons-Rosen, Christian    | Universitat Pompeu Fabra                    |
| Fontaine, Jean-Sébastien | Bank of Canada                              |
| Forbes, Silke            | Case Western Reserve University             |
| Foros, Øystein           | Norwegian School of Economics               |
| Fos, Vyacheslav          | Boston College                              |
| Fosfuri, Andrea          | Bocconi University                          |
| Foster, Joshua           | Whitman College                             |
| Fox, Jeremy              | University of Michigan                      |
| Fracassi, Cesare         | University of Texas at Austin               |
| Fragiadakis, Daniel      | Stanford University                         |
| Francetich, Alejandro    | Bocconi University                          |
| Francis, Bill            | Rensselaer Polytechnic Institute            |
| Franke, Nikolaus         | Vienna University of Economics and Business |
| Frankel, Richard         | Washington University in St. Louis          |
| Friedman, Henry          | University of California, Los Angeles       |
| Friewald, Nils           | Vienna University of Economics and Business |
| Frimor, Hans             | Aarhus University                           |
| Fu, Michael              | University of Maryland                      |
| Fujita, Kentaro          | The Ohio State University                   |
| Fulford, Scott           | Boston College                              |
| Fuller, Robert           | University of Tennessee                     |
| Fulton, Murray           | University of Saskatchewan                  |
| Funk, Patricia           | Universitat Pompeu Fabra                    |
| Funk, Russell            | University of Minnesota                     |
| Furman, Jeff             | Boston University                           |
| Fuster, Andreas          | Federal Reserve Bank of New York            |
| Galak, Jeff              | Carnegie Mellon University                  |

|                      |                                             |
|----------------------|---------------------------------------------|
| Galasso, Alberto     | University of Toronto                       |
| Galbreth, Michael    | University of South Carolina                |
| Gallino, Santiago    | Dartmouth College                           |
| Gallmeyer, Michael   | University of Virginia                      |
| Gallo, Lindsey       | University of Michigan                      |
| Gal-Or, Esther       | University of Pittsburgh                    |
| Galpin, Neal         | University of Melbourne                     |
| Gambardella, Alfonso | Bocconi University                          |
| Ganco, Martin        | University of Wisconsin-Madison             |
| Gande, Amar          | Southern Methodist University               |
| Ganguli, Ina         | University of Massachusetts Amherst         |
| Gangwar, Manish      | Indian School of Business                   |
| Gao, George          | Cornell University                          |
| Gao, Guodong         | University of Maryland                      |
| Gao, Huasheng        | Nanyang Technological University            |
| Gao, Long            | University of California, Riverside         |
| Gao, Pengjie         | University of Notre Dame                    |
| Gao, Pingyang        | University of Chicago                       |
| Gao, Ruoran          | Cornell University                          |
| Gaonkar, Shweta      | Johns Hopkins University                    |
| Garcia, Diego        | University of North Carolina at Chapel Hill |
| Gardete, Pedro       | Stanford University                         |
| Gardner, Heidi       | Harvard University                          |
| Garfinkel, Robert    | University of Connecticut                   |
| Garg, Rajiv          | University of Texas at Austin               |
| Garrow, Laurie       | Georgia Institute of Technology             |
| Gartenberg, Claudine | New York University                         |
| Garthwaite, Craig    | Northwestern University                     |
| Gaspar, Jose Miguel  | ESSEC                                       |
| Gassen, Joachim      | Humboldt Universität zu Berlin              |
| Gavirneni, Srinagesh | Cornell University                          |
| Gayer, Gabrielle     | University of Haifa                         |
| Gayon, Jean-Philippe | Grenoble Institute of Technology            |
| Ge, Weili            | University of Washington                    |
| Gee, Laura           | Tufts University                            |
| Geltner, David       | Massachusetts Institute of Technology       |
| Geng, Xianjun        | University of Texas at Dallas               |
| Georganas, Sotiris   | City University London                      |
| Georgiou, Angelos    | ETH Zurich                                  |
| Georgiadis, George   | Boston University                           |
| Gerakos, Joseph      | University of Chicago                       |
| Geylani, Tansev      | University of Pittsburgh                    |
| Ghamami, Samim       | University of California, Berkeley          |
| Ghent, Andra         | University of Wisconsin-Madison             |
| Ghosh, Bikram        | University of Arizona                       |
| Ghossoub, Mario      | Imperial College London                     |
| Giarratana, Marco    | Bocconi University                          |
| Gibbons, Bob         | Massachusetts Institute of Technology       |
| Gierlinger, Johannes | Universitat Autònoma de Barcelona           |

|                          |                                       |
|--------------------------|---------------------------------------|
| Giesecke, Kay            | Stanford University                   |
| Gigena, Manuel           | Katholieke Universiteit Leuven        |
| Giglio, Stefano          | University of Chicago                 |
| Gilbride, Tim            | University of Notre Dame              |
| Gill, David              | University of Oxford                  |
| Gillanders, Robert       | Hanken School of Economics            |
| Gillen, Ben              | California Institute of Technology    |
| Gine, Xavier             | World Bank                            |
| Gino, Francesca          | Harvard University                    |
| Girard, Yann             | Goethe University of Frankfurt        |
| Girotra, Karan           | INSEAD                                |
| Giroud, Xavier           | Massachusetts Institute of Technology |
| Giustiziero, Gianluigi   | University of Michigan                |
| Glasserman, Paul         | Columbia University                   |
| Glätzle-Rützler, Daniela | University of Innsbruck               |
| Gleason, Cristi A.       | University of Iowa                    |
| Glode, Vincent           | University of Pennsylvania            |
| Glorie, Kristiaan        | Erasmus University                    |
| Glover, Jonathan         | Columbia University                   |
| Gneezy, Ayelet           | University of California, San Diego   |
| Gobet, Emmanuel          | Ecole Polytechnique                   |
| Goel, Sharad             | Stanford University                   |
| Goette, Lorenz           | University of Lausanne                |
| Goex, Robert             | University of Zurich                  |
| Gofman, Michael          | University of Wisconsin-Madison       |
| Goh, Joel                | Harvard University                    |
| Goh, Kenneth             | University of Western Ontario         |
| Goh, Khim Yong           | National University of Singapore      |
| Gokpinar, Bilal          | University College London             |
| Goldberg, David          | Georgia Institute of Technology       |
| Goldfarb, Avi            | University of Toronto                 |
| Goldfarb, Brent          | University of Maryland                |
| Goldman, Eitan           | Indiana University                    |
| Goldstein, Adam          | Harvard University                    |
| Goldstein, Dan           | Microsoft Research                    |
| Goldstein, Michael       | Babson College                        |
| Golob, Ursa              | University of Ljubljana               |
| Gomes, Francisco         | London Business School                |
| Gong, Erick              | Middlebury College                    |
| Gonzalez-Urbe, Juanita   | London School of Economics            |
| Goodman, Joseph          | Washington University in St. Louis    |
| Goodwin, Geoffrey        | University of Pennsylvania            |
| Gopalakrishnan, Arun     | Washington University in St. Louis    |
| Gopalan, Radhakrishnan   | Washington University in St. Louis    |
| Gorbatai, Andreea        | University of California, Berkeley    |
| Gorbenko, Alexander      | London Business School                |
| Gordon, Brett            | Northwestern University               |
| Gormley, Todd            | University of Pennsylvania            |
| Gornall, Will            | University of British Columbia        |

|                        |                                         |
|------------------------|-----------------------------------------|
| Gourio, Francois       | Federal Reserve Bank of Chicago         |
| Goyal, Manu            | University of Utah                      |
| Goyal, Vineet          | Columbia University                     |
| Goyenko, Ruslan        | McGill University                       |
| Graham, Stuart         | Georgia Institute of Technology         |
| Granja, Joao           | Massachusetts Institute of Technology   |
| Grassi, Basile         | University of Oxford                    |
| Gravert, Christina     | University of Gothenburg                |
| Gray, John             | The Ohio State University               |
| Gray, Peter            | University of Virginia                  |
| Green, Clifton         | Emory University                        |
| Green, Jeremiah        | Pennsylvania State University           |
| Greenberg, Adam        | University of California, San Diego     |
| Greenstein, Shane      | Northwestern University                 |
| Greenwood, Brad        | Temple University                       |
| Grennan, Matthew       | University of Toronto                   |
| Gretschko, Vitali      | University of Cologne                   |
| Griffin, Dale          | University of British Columbia          |
| Griffin, Jacqueline    | Northeastern University                 |
| Grossman, Philip       | Monash University                       |
| Grossman, Zachary      | University of California, Santa Barbara |
| Grote, Gudela          | ETH Zurich                              |
| Grubb, Michael         | Boston College                          |
| Grundl, Serafin        | Federal Reserve Board                   |
| Grushka-Cockayne, Yael | University of Virginia                  |
| Gryglewicz, Sebastian  | Erasmus University                      |
| Gu, Zhaoyang           | Chinese University of Hong Kong         |
| Guajardo, Jose         | University of California, Berkeley      |
| Gui, Luyi              | University of California, Irvine        |
| Guillen Alvarez, Pablo | University of Sydney                    |
| Gulen, Huseyin         | Purdue University                       |
| Gumus, Mehmet          | McGill University                       |
| Guo, Hong              | University of Notre Dame                |
| Guo, Lixiong           | University of New South Wales           |
| Guo, Pengfei           | Hong Kong Polytechnic University        |
| Gupta, Diwakar         | University of Minnesota                 |
| Gupta, Sudheer         | Simon Fraser University                 |
| Gupta, Varun           | University of Chicago                   |
| Gupta, Vishal          | University of Southern California       |
| Gur, Yonatan           | Stanford University                     |
| Gurnani, Haresh        | Wake Forest University                  |
| Gürtler, Oliver        | University of Cologne                   |
| Guttman, Ilan          | New York University                     |
| Haaland, Ingar         | NHH Norwegian School of Economics       |
| Haddad, Valentin       | Princeton University                    |
| Hadlock, Charles       | Michigan State University               |
| Hafalir, Isa           | Carnegie Mellon University              |
| Hah, Hyeyoung          | Emory University                        |
| Hahl, Oliver           | Carnegie Mellon University              |

|                        |                                       |
|------------------------|---------------------------------------|
| Hahn, Eugene           | Salisbury University                  |
| Hail, Luzi             | University of Pennsylvania            |
| Hales, Jeffrey         | Georgia Institute of Technology       |
| Halevy, Nir            | Stanford University                   |
| Halevy, Yoram          | University of British Columbia        |
| Haliassos, Michael     | Goethe University of Frankfurt        |
| Hallen, Benjamin       | University of Washington              |
| Ham, Sung              | George Washington University          |
| Han, Bing              | University of Texas at Austin         |
| Han, Kunsoo            | McGill University                     |
| Han, Lu                | University of Toronto                 |
| Han, Sang Pil          | Arizona State University              |
| Hanasusanto, Grani     | Imperial College London               |
| Hansen, Karsten        | University of California, San Diego   |
| Hansen, Stephen        | Naval Postgraduate School             |
| Hanson, Samuel         | Harvard University                    |
| Hao, Lin               | University of Notre Dame              |
| Haran, Uriel           | Ben-Gurion University of the Negev    |
| Harbring, Christine    | RWTH Aachen University                |
| Hardie, Bruce          | London Business School                |
| Hardisty, David        | University of British Columbia        |
| Harrington, Joseph     | University of Pennsylvania            |
| Harrison, Spencer      | Boston College                        |
| Harsha, Pavithra       | Massachusetts Institute of Technology |
| Hartman, Joseph        | University of Florida                 |
| Hartman-Glaser, Barney | University of California, Los Angeles |
| Hartmann, Wesley       | Stanford University                   |
| Hartzmark, Samuel      | University of Southern California     |
| Haruvy, Ernan          | University of Texas at Dallas         |
| Hasan, Sharique        | Stanford University                   |
| Haselmann, Rainer      | Bonn University                       |
| Hashmi, Aamir          | National University of Singapore      |
| Hasija, Sameer         | INSEAD                                |
| Hassin, Refael         | Tel Aviv University                   |
| Hastie, Reid           | University of Chicago                 |
| Haugh, Martin          | Columbia University                   |
| Haushofer, Johannes    | Princeton University                  |
| Hausken, Kjell         | University of Stavanger               |
| Hauswald, Robert       | American University                   |
| Hawk, Ashton           | The Ohio State University             |
| Hayashi, Takashi       | University of Glasgow                 |
| Hazen, Gordon          | Northwestern University               |
| He, Chuan              | University of Colorado at Boulder     |
| He, Jie                | University of Georgia                 |
| He, Simai              | City University of Hong Kong          |
| He, Xuedong            | Columbia University                   |
| Healy, Paul            | Harvard University                    |
| Hegde, Deepak          | New York University                   |
| Heinle, Mirko          | University of Pennsylvania            |

|                      |                                             |
|----------------------|---------------------------------------------|
| Heinz, Matthias      | Goethe University of Frankfurt              |
| Heitzman, Shane      | University of Southern California           |
| Hellmann, Thomas     | University of Oxford                        |
| Helmers, Christian   | Universidad Carlos III de Madrid            |
| Helwege, Jean        | University of California, Riverside         |
| Hemmer, Thomas       | Rice University                             |
| Henderson, Shane     | Cornell University                          |
| Henderson, Vicky     | University of Warwick                       |
| Hendricks, Bradley   | University of North Carolina at Chapel Hill |
| Henkel, Joachim      | Technische Universität München              |
| Henry, Tyler         | Miami University                            |
| Herer, Yale          | Technion                                    |
| Hernandez, Exequiel  | University of Pennsylvania                  |
| Herold, Florian      | University of Bamberg                       |
| Hertzberg, Andrew    | Columbia University                         |
| Hervas-Drane, Andres | University College London                   |
| Herweg, Fabian       | University of Munich                        |
| Herz, Holger         | University of Zurich                        |
| Herzog, Stefan       | Max Planck Institute for Human Development  |
| Hess, James          | University of Houston                       |
| Heston, Steven       | University of Maryland                      |
| Higgins, Matt        | Georgia Institute of Technology             |
| Highhouse, Scott     | Bowling Green State University              |
| Hijazi, Hassan       | NICTA                                       |
| Hillegeist, Stephen  | Arizona State University                    |
| Hinnosaar, Toomas    | Collegio Carlo Alberto                      |
| Hirshleifer, David   | University of California, Irvine            |
| Hjalmarsson, Erik    | University of Gothenburg                    |
| Ho, Steven Wei       | Tsinghua University                         |
| Ho, Yi-Chun          | George Washington University                |
| Hobson, David        | University of Warwick                       |
| Hochberg, Yael       | Rice University                             |
| Hoegg, JoAndrea      | University of British Columbia              |
| Hoelzl, Erik         | University of Cologne                       |
| Hoetker, Glenn       | University of Illinois at Urbana-Champaign  |
| Hoffman, Moshe       | University of Chicago                       |
| Hofmann, Christian   | Ludwig Maximilian University of Munich      |
| Hogarth, Robin       | Universitat Pompeu Fabra                    |
| Hoisl, Karin         | University of Munich                        |
| Holburn, Guy         | University of Western Ontario               |
| Holguin-Veras, Jose  | Rensselaer Polytechnic Institute            |
| Holm, Hakan          | Lund University                             |
| Holt, Charles        | University of Virginia                      |
| Homonoff, Tatiana    | Cornell University                          |
| Hong, Jeff           | City University of Hong Kong                |
| Hong, Kevin          | Arizona State University                    |
| Hong, Seung-Hyun     | University of Illinois at Urbana-Champaign  |
| Honhon, Dorothee     | University of Texas at Dallas               |
| Honka, Elisabeth     | University of Texas at Dallas               |

|                          |                                                |
|--------------------------|------------------------------------------------|
| Hope, Ole-Kristian       | University of Toronto                          |
| Hoppe, Heidrun           | University of Hannover                         |
| Hora, Manpreet           | Georgia Institute of Technology                |
| Horton, Joanne           | Exeter University                              |
| Horton, John             | New York University                            |
| Hossain, Tanjim          | University of Toronto                          |
| Hou, Kewei               | The Ohio State University                      |
| Houser, Daniel           | George Mason University                        |
| Howell, Sabrina          | New York University                            |
| Howison, James           | University of Texas at Austin                  |
| Hribar, Paul             | University of Iowa                             |
| Hsu, Po-Hsuan            | University of Hong Kong                        |
| Hu, Bin                  | University of North Carolina at Chapel Hill    |
| Hu, Grace                | University of Hong Kong                        |
| Hu, Ming                 | University of Toronto                          |
| Hu, Zhenyu               | National University of Singapore               |
| Huang, Alan              | University of Waterloo                         |
| Huang, Chong             | University of California, Irvine               |
| Huang, Dashan            | Singapore Management University                |
| Huang, Guofang           | Carnegie Mellon University                     |
| Huang, James             | Lancaster University                           |
| Huang, Jennifer          | Cheung Kong Graduate School of Business        |
| Huang, Jiekun            | University of Illinois at Urbana-Champaign     |
| Huang, Jing-zhi          | Pennsylvania State University                  |
| Huang, Junfei            | Chinese University of Hong Kong                |
| Huang, Kelly             | Florida International University               |
| Huang, Kenneth           | Singapore Management University                |
| Huang, Ke-Wei            | National University of Singapore               |
| Huang, Peng              | University of Maryland                         |
| Huang, Shawn             | Arizona State University                       |
| Huang, Sheng             | Singapore Management University                |
| Huang, Shiyang           | London School of Economics                     |
| Huang, Simon             | Southern Methodist University                  |
| Huang, Tingliang         | University College London                      |
| Huang, Xing              | Michigan State University                      |
| Huang, Yan               | University of Michigan                         |
| Huber, Joel              | Duke University                                |
| Huck, Steffan            | WZB Berlin                                     |
| Huckman, Robert          | Harvard University                             |
| Huddart, Steven          | Pennsylvania State University                  |
| Hugon, Artur             | Arizona State University                       |
| Hui, Kai Wai             | Hong Kong University of Science and Technology |
| Huisman, Kuno            | Tilburg University                             |
| Hung, Angela             | RAND Corporation                               |
| Huntsinger, Jeffrey      | Loyola University Chicago                      |
| Hurd, Tom                | McMaster University                            |
| Hurlin, Christophe       | University of Orleans                          |
| Huson, Mark              | University of Alberta                          |
| Hutchison-Krupat, Jeremy | University of Virginia                         |

|                        |                                            |
|------------------------|--------------------------------------------|
| Hvide, Hans            | University of Bergen                       |
| Hvidkjaer, Soeren      | Copenhagen Business School                 |
| Hwang, Byoung-Hyoun    | Cornell University                         |
| Hydari, Muhammad       | Carnegie Mellon University                 |
| Hyndman, Kyle          | University of Texas at Dallas              |
| Iancu, Dan             | Stanford University                        |
| Ibanez, Maria          | Harvard University                         |
| Ibrahim, Rouba         | University College London                  |
| Ifcher, John           | Santa Clara University                     |
| Illeditsch, Philipp    | University of Pennsylvania                 |
| Illiev, Peter          | Pennsylvania State University              |
| Imas, Alex             | Carnegie Mellon University                 |
| Inbar, Yoel            | University of Toronto                      |
| Inderst, Roman         | Frankfurt University                       |
| Ingolfsson, Armann     | University of Alberta                      |
| Ioannidou, Vasso       | Lancaster University                       |
| Ioannou, Ioannis       | London Business School                     |
| Irani, Rustom          | University of Illinois at Urbana-Champaign |
| Iravani, Foad          | University of Washington                   |
| Iriberry, Nagore       | Universitat Pompeu Fabra                   |
| Irlenbusch, Bernd      | University of Cologne                      |
| Irvine, Paul           | Texas Christian University                 |
| Ishihara, Masakazu     | New York University                        |
| Israelsen, Ryan Dwight | Indiana University                         |
| Ito, Koichiro          | Boston University                          |
| Ivkovich, Zoran        | Michigan State University                  |
| Iyengar, Raghuram      | University of Pennsylvania                 |
| Iyer, Krishnamurthy    | Cornell University                         |
| Iyer, Rajkamal         | Massachusetts Institute of Technology      |
| Izhakian, Yehuda       | New York University                        |
| Jackson, Scott         | University of South Carolina               |
| Jackwerth, Jens        | University of Konstanz                     |
| Jacobsen, Stacey       | Southern Methodist University              |
| Jaeger, Simon          | Harvard University                         |
| Jaffe, Sonia           | University of Chicago                      |
| Jagabathula, Srikanth  | New York University                        |
| Jagannathan, Ravi      | Northwestern University                    |
| Jagolinzer, Alan       | University of Colorado at Boulder          |
| Jahan-Parvar, Mohammad | Federal Reserve Board                      |
| Jain, Aditya           | Baruch College                             |
| Jain, Amit             | National University of Singapore           |
| Jain, Apurva           | University of Washington                   |
| Jain, Nitish           | INSEAD                                     |
| Jamal, Karim           | University of Alberta                      |
| Janakiraman, Ganesh    | University of Texas at Dallas              |
| Janakiraman, Narayanan | University of Texas at Arlington           |
| Jang, Yeejin           | Purdue University                          |
| Janssen, Meike         | University of Kassel                       |
| Jasin, Stefanus        | University of Michigan                     |

|                          |                                                    |
|--------------------------|----------------------------------------------------|
| Jaumandreu, Jordi        | Boston University                                  |
| Jayaraman, Sudarshan     | University of Rochester                            |
| Jenter, Dirk             | Stanford University                                |
| Jeppesen, Lars           | Bocconi University                                 |
| Jerath, Kinshuk          | Columbia University                                |
| Jermann, Urban           | University of Pennsylvania                         |
| Ji, Yonghua              | University of Alberta                              |
| Jia, Nan                 | University of Southern California                  |
| Jia , Justin             | Purdue University                                  |
| Jiaing, Ping             | University of International Business and Economics |
| Jian, Lian               | University of Southern California                  |
| Jiang, Baojun            | Washington University in St. Louis                 |
| Jiang, Danling           | Florida State University                           |
| Jiang, George            | University of Arizona                              |
| Jiang, Hao               | Michigan State University                          |
| Jiang, John              | Michigan State University                          |
| Jiang, Li                | Hong Kong Polytechnic University                   |
| Jiang, Wenxi             | Yale University                                    |
| Jiang, Xu                | Duke University                                    |
| Jin, Ginger              | University of Maryland                             |
| Jin, Lawrence            | California Institute of Technology                 |
| Jin, Yizhou              | Harvard University                                 |
| Jindal, Pranav           | University of North Carolina at Chapel Hill        |
| Jing, Bing               | Cheung Kong Graduate School of Business            |
| Joglekar, Nitin          | Boston University                                  |
| Johar, Monica            | University of North Carolina at Charlotte          |
| Johnson, Eric            | Columbia University                                |
| Johnson, Garrett         | University of Rochester                            |
| Johnson, Justin          | Cornell University                                 |
| Johnson, Steven          | University of Virginia                             |
| Johnson, William         | Suffolk University                                 |
| Johnston, Rick           | City University London                             |
| Jones, Ben               | Northwestern University                            |
| Jordan, Alexander H.     | Dartmouth College                                  |
| Jose, Victor             | Georgetown University                              |
| Joseph, Kissan           | University of Kansas                               |
| Joshi, Yogesh            | University of Maryland                             |
| Jostova, Gergana         | George Washington University                       |
| Jotikasthira, Pab        | University of North Carolina at Chapel Hill        |
| Juergens, Jennifer       | Drexel University                                  |
| Julio, Brandon           | University of Oregon                               |
| Jung, Changmi            | Johns Hopkins University                           |
| Jung, Michael            | New York University                                |
| Jung, Minah              | University of California, Berkeley                 |
| Kabra, Ashish            | INSEAD                                             |
| Kachelmeier, Steve       | University of Texas at Austin                      |
| Kacperczyk, Aleksandra   | Massachusetts Institute of Technology              |
| Kacperczyk, Marcin       | Imperial College London                            |
| Kadapakkam, Palani-Rajan | University of Texas at San Antonio                 |

|                     |                                       |
|---------------------|---------------------------------------|
| Kadiyala, Bharadwaj | University of Texas at Dallas         |
| Kadiyali, Vrinda    | Cornell University                    |
| Kaeck, Andreas      | University of Sussex                  |
| Kahl, Matthias      | University of Colorado at Boulder     |
| Kahle, Kathleen     | University of Arizona                 |
| Kahn, Lisa          | Yale University                       |
| Kahraman, Bige      | Stockholm School of Economics         |
| Kajackaite, Agne    | University of Cologne                 |
| Kalaiganam, Kartik  | University of South Carolina          |
| Kalcsics, Joerg     | University of Edinburgh               |
| Kale, Jayant        | Northeastern University               |
| Kalimipalli, Madhu  | Wilfrid Laurier University            |
| Kalkanci, Basak     | Georgia Institute of Technology       |
| Kalwani, Manohar    | Purdue University                     |
| Kalyanam, Kirthi    | Santa Clara University                |
| Kameda, Tatsuya     | University of Tokyo                   |
| Kan, Raymond        | University of Toronto                 |
| Kane, Aimee         | Duquesne University                   |
| Kane, Gerald        | Boston College                        |
| Kang, Jun-Koo       | Nanyang Technological University      |
| Kaniel, Ron         | University of Rochester               |
| Kanodia, Chandra    | University of Minnesota               |
| Kapadia, Nikunj     | University of Massachusetts Amherst   |
| Kapoor, Rahul       | University of Pennsylvania            |
| Karaca, Huseyin     | Bogazici University                   |
| Karaesmen, Fikri    | Koç University                        |
| Kareev, Yaakov      | Hebrew University of Jerusalem        |
| Kasa, Kenneth       | Simon Fraser University               |
| Kasznik, Ron        | Stanford University                   |
| Katok, Elena        | University of Texas at Dallas         |
| Katona, Zsolt       | University of California, Berkeley    |
| Katz, Sharon        | Columbia University                   |
| Kaufmann, Christine | University of Mannheim                |
| Kaul, Aseem         | University of Minnesota               |
| Kaur, Supreet       | Columbia University                   |
| Kaustia, Markku     | Aalto University                      |
| Kaya, Murat         | Sabanci University                    |
| Kayis, Enis         | Ozyegin University                    |
| KC, Diwas           | Emory University                      |
| Ke, Bin             | National University of Singapore      |
| Ke, T. Tony         | Massachusetts Institute of Technology |
| Kecskes, Ambrus     | York University                       |
| Kedia, Simi         | Rutgers University                    |
| Kekatos, Vassilis   | University of Minnesota               |
| Keller, JR          | University of Pennsylvania            |
| Kelley, Eric        | University of Arizona                 |
| Kellner, Christian  | University of Bonn                    |
| Kelly, Bryan        | University of Chicago                 |
| Kelly, Peter        | Yale University                       |

|                       |                                                |
|-----------------------|------------------------------------------------|
| Kelly, Theresa        | Washington University in St. Louis             |
| Kemahlioglu-Ziya, Eda | University of North Carolina at Chapel Hill    |
| Kerr, William         | Harvard University                             |
| Kesavan, Saravanan    | University of North Carolina at Chapel Hill    |
| Keskek, Sami          | University of Arkansas                         |
| Keskin, N. Bora       | Duke University                                |
| Kessler, Judd         | University of Pennsylvania                     |
| Keys, Benjamin        | University of Chicago                          |
| Khalil, Fahad         | University of Washington                       |
| Khan, Mozaffar        | University of Minnesota                        |
| Khan, Uzma            | Stanford University                            |
| Khessina, Olga        | Cornell University                             |
| Khuntia, Jiban        | University of Colorado at Denver               |
| Khwaja, Ahmed         | Yale University                                |
| Kieschnick, Robert    | University of Texas at Dallas                  |
| Kilinc-Karzan, Fatma  | Carnegie Mellon University                     |
| Killeen, Peter        | Arizona State University                       |
| Kim, Byung-Cheol      | Georgia Institute of Technology                |
| Kim, Chang Soo        | Yonsei University                              |
| Kim, Dasol            | Case Western Reserve University                |
| Kim, Heeyon           | National University of Singapore               |
| Kim, Hyunseob         | Cornell University                             |
| Kim, J. B.            | University of Waterloo                         |
| Kim, Jeong-bon        | City University of Hong Kong                   |
| Kim, Jerry            | Columbia University                            |
| Kim, Ji-Hyun (Jason)  | Yonsei University                              |
| Kim, Jun              | Hong Kong University of Science and Technology |
| Kim, Jung Hoon        | Florida International University               |
| Kim, Keongtae         | City University of Hong Kong                   |
| Kim, Sang-Hyun        | Yale University                                |
| Kim, Seoyoung         | Santa Clara University                         |
| kim, sharon           | Johns Hopkins University                       |
| Kim, Song-Hee         | University of Southern California              |
| Kim, Soohun           | Georgia Institute of Technology                |
| Kim, Sung             | University of Wisconsin-Madison                |
| Kim, Taehyun          | University of Notre Dame                       |
| KIM, Y. Han (Andy)    | Nanyang Technological University               |
| Kim, Yongsuk          | Hong Kong University of Science and Technology |
| Kim, Yongtae          | Santa Clara University                         |
| Kimbrough, Michael    | University of Maryland                         |
| Kimmel, Robert        | EDHEC Business School                          |
| King, Michael         | University of Western Ontario                  |
| Kirchler, Michael     | University of Innsbruck                        |
| Kirk, Marcus          | University of Florida                          |
| Kittsteiner, Thomas   | RWTH Aachen University                         |
| Klayman, Joshua       | University of Chicago                          |
| Kleinbaum, Adam       | Dartmouth College                              |
| Knight, Andrew        | Washington University in St. Louis             |
| Knott, Anne Marie     | Washington University in St. Louis             |

|                      |                                            |
|----------------------|--------------------------------------------|
| Kocabiyikoglu, Ayse  | Bilkent University                         |
| Koch, Andrew         | University of Pittsburgh                   |
| Kocher, Martin       | University of Munich                       |
| Kockesen, Levent     | Koç University                             |
| Koenigsberg, Oded    | London Business School                     |
| Koester, Allison     | Georgetown University                      |
| Kogan, Shimon        | Carnegie Mellon University                 |
| Koh, Byungwan        | University of Calgary                      |
| Koijen, Ralph S.J.   | London Business School                     |
| Kokkodis, Marios     | Boston College                             |
| Kolasinski, Adam     | Texas A&M University                       |
| Kölle, Felix         | University of Nottingham                   |
| Kominers, Scott      | Harvard University                         |
| Kondor, Peter        | Central European University                |
| Kong, Guangwen       | University of Minnesota                    |
| Kong, Nan            | Purdue University                          |
| Koning, Rembrand     | Stanford University                        |
| Koo, Hyeng Keun      | Ajou University                            |
| Koole, Ger           | Vrije Universiteit Amsterdam               |
| Kopalle, Praveen     | Dartmouth College                          |
| Kops, Christopher    | Goethe University of Frankfurt             |
| Korniotis, George    | University of Miami                        |
| Kornish, Laura       | University of Colorado at Boulder          |
| Körpeoğlu, Ersin     | University College London                  |
| Kosfeld, Michael     | Goethe University of Frankfurt             |
| Kosova, Renata       | Imperial College London                    |
| Kosse, Fabian        | University of Bonn                         |
| Kostakis, Alexandros | Manchester Business School                 |
| Kostami, Vasiliki    | London Business School                     |
| Kostovetsky, Leonard | Boston College                             |
| Kothiyal, Amit       | Max Planck Institute for Human Development |
| Kotter, Jason        | Pennsylvania State University              |
| Kou, Steven          | National University of Singapore           |
| Kouchaki, Maryam     | Northwestern University                    |
| Kouwenberg, Roy      | Mahidol University                         |
| Kovacs, Balazs       | Yale University                            |
| Kozhan, Roman        | University of Warwick                      |
| Koziol, Christian    | University of Tuebingen                    |
| Kraft, Pepa          | New York University                        |
| Kraft, Tim           | University of Virginia                     |
| Kramer, Lisa         | University of Toronto                      |
| Krämer, Jan          | University of Passau                       |
| Krasnova, Hanna      | University of Bern                         |
| Kremer, Mirko        | Frankfurt School of Finance and Management |
| Kretschmer, Tobias   | Ludwig Maximilian University of Munich     |
| Krishnan, Harish     | University of British Columbia             |
| Krishnan, Karthik    | Northeastern University                    |
| Krishnan, Ranjani    | Michigan State University                  |
| Kristal, Tali        | University of Haifa                        |

|                       |                                                 |
|-----------------------|-------------------------------------------------|
| Kroll, Stephan        | Colorado State University                       |
| Kronlund, Mathias     | University of Illinois at Urbana-Champaign      |
| Krscynski, David      | Brigham Young University                        |
| Kube, Sebastian       | University of Bonn                              |
| Kübler, Dorothea      | WZB Berlin                                      |
| Kucukyavuz, Simge     | The Ohio State University                       |
| Kuehn, Lars-Alexander | Carnegie Mellon University                      |
| Kuhn, Daniel          | École Polytechnique Fédérale de Lausanne (EPFL) |
| Kuhnen, Camelia       | University of North Carolina at Chapel Hill     |
| Kuksov, Dmitri        | University of Texas at Dallas                   |
| Kulchina, Elena       | Duke University                                 |
| Kumar, Alok           | University of Miami                             |
| Kumar, Anuj           | University of Florida                           |
| Kumar, Ashwin         | Carnegie Mellon University                      |
| Kumar, Nanda          | University of Texas at Dallas                   |
| Kumar, Praveen        | University of Houston                           |
| Kumar, Vineet         | Yale University                                 |
| Kummer, Michael       | Centre for European Economic Research           |
| Kundisch, Dennis      | University of Paderborn                         |
| Kunnumkal, Sumit      | Indian School of Business                       |
| Kuosmanen, Timo       | Aalto University                                |
| Kuppuswamy, Venkat    | University of North Carolina at Chapel Hill     |
| Kurtulus, Mumin       | Vanderbilt University                           |
| Kuruzovich, Jason     | Rensselaer Polytechnic Institute                |
| Kushwaha, Tarun       | University of North Carolina at Chapel Hill     |
| Kvaloy, Ola           | University of Stavanger                         |
| Kwasnica, Anthony     | Pennsylvania State University                   |
| Kwon, H. Dharma       | University of Illinois at Urbana-Champaign      |
| Labro, Eva            | University of North Carolina at Chapel Hill     |
| Iacetera, nico        | University of Toronto                           |
| Iacetera, Nicola      | University of Toronto                           |
| Lahiri, Atanu         | University of Texas at Dallas                   |
| Lai, Guoming          | University of Texas at Austin                   |
| Lambrecht, Anja       | London Business School                          |
| Lampe, Ryan           | California State University, East Bay           |
| Landwehr, Jan         | Goethe University of Frankfurt                  |
| Lang, Matthias        | Free University Berlin                          |
| Langberg, Nisan       | University of Houston                           |
| Langer, Nishtha       | Rensselaer Polytechnic Institute                |
| Laporte, Gilbert      | University of Montreal                          |
| Larkin, Ian           | Harvard University                              |
| Larrain, Borja        | Pontificia Universidad Católica de Chile        |
| Larrick, Richard      | Duke University                                 |
| Larsen, Brad          | Stanford University                             |
| Laseter, Timothy      | University of Virginia                          |
| Laske, Katharina      | University of Cologne                           |
| Lau, Morten           | Durham University                               |
| Lauga, Dominique      | University of Cambridge                         |
| Laux, Volker          | University of Texas at Austin                   |

|                          |                                                    |
|--------------------------|----------------------------------------------------|
| Lavieri, Mariel          | University of Michigan                             |
| Lawarree, Jacques        | University of Washington                           |
| Lawrence, Alastair       | University of California, Berkeley                 |
| Lazarev, John            | New York University                                |
| Lazzati, Natalia         | University of California, Santa Cruz               |
| Le, Anh                  | Pennsylvania State University                      |
| Le Lec, Fabrice          | Catholic University of Lille                       |
| Le Mens, Gael            | Universitat Pompeu Fabra                           |
| Leah-Martin, Vincent     | University of California, San Diego                |
| Leary, Mark              | Cornell University                                 |
| Léautier, Thomas-Olivier | Toulouse School of Economics                       |
| Lecuona, Ramon           | Duke University                                    |
| Lee, Clarence            | Cornell University                                 |
| Lee, Deishin             | Boston College                                     |
| Lee, Dokyun              | Carnegie Mellon University                         |
| Lee, Donald              | Yale University                                    |
| Lee, Hsiao-Hui           | University of Hong Kong                            |
| Lee, Inmoo               | Korea Advanced Institute of Science and Technology |
| Lee, Jeho                | KAIST Graduate School of Management                |
| Lee, Jinhyung            | Sungkyunkwan University                            |
| Lee, Kuan-Hui            | Seoul National University                          |
| Lee, Mina                | Washington University in St. Louis                 |
| Lee, Suzanne             | Georgia Institute of Technology                    |
| Lefort, Jean-Philippe    | Université Paris Dauphine                          |
| Lefouilli, Yassine       | Toulouse School of Economics                       |
| Lehar, Alfred            | University of Calgary                              |
| Lehman, David            | University of Virginia                             |
| Leibbrandt, Andreas      | Monash University                                  |
| Leider, Stephen          | University of Michigan                             |
| Leiponen, Aija           | Imperial College London                            |
| Leitner, Yaron           | Federal Reserve Bank of Philadelphia               |
| Leland, Jon              | National Science Foundation                        |
| Lelieveld, Gert-Jan      | Leiden University                                  |
| Lemoine, Derek           | University of Arizona                              |
| Lenk, Peter              | University of Michigan                             |
| Leonard, Kenneth         | University of Maryland                             |
| Leone, Andrew            | University of Miami                                |
| Lepore, Caterina         | Imperial College London                            |
| Lergetporer, Philipp     | Ifo Institute for Economic Research                |
| Lerner, Jennifer         | Harvard University                                 |
| Leshno, Jacob            | Columbia University                                |
| Leung, Ming              | University of California, Berkeley                 |
| Leung, Tim               | Columbia University                                |
| Levav, Jonathan          | Stanford University                                |
| Levesque, Moren          | York University                                    |
| Levine, David            | Washington University in St. Louis                 |
| Levine, Emma             | University of Pennsylvania                         |
| Levine, Ross             | University of California, Berkeley                 |
| Levine, Sheen            | University of Texas at Dallas                      |

|                        |                                                |
|------------------------|------------------------------------------------|
| Levy, Matthew          | London School of Economics                     |
| Lewellen, Jonathan     | Dartmouth College                              |
| Lewellen, Katharina    | Dartmouth College                              |
| l'Haridon, Olivier     | University of Rennes 1                         |
| Li, Beibei             | New York University                            |
| Li, Chenxu             | Peking University                              |
| Li, Cuihong            | University of Connecticut                      |
| Li, Dan                | Federal Reserve Board                          |
| Li, Danielle           | Harvard University                             |
| Li, Dongmei            | University of South Carolina                   |
| Li, Guang              | University of Southern California              |
| Li, Hongmin            | Arizona State University                       |
| Li, Hongyi             | University of New South Wales                  |
| Li, Ivy                | Fudan University                               |
| Li, Jing               | Carnegie Mellon University                     |
| Li, Jun                | University of Michigan                         |
| Li, Jun                | University of Texas at Dallas                  |
| Li, Kevin              | University of California, Riverside            |
| Li, Meng               | University of Illinois at Urbana-Champaign     |
| Li, Meng               | University of Texas at Dallas                  |
| Li, Shaojin            | Shanghai University of Finance and Economics   |
| Li, Sherry             | University of Texas at Dallas                  |
| Li, Sophia             | Michigan State University                      |
| Li, Tao                | City University of Hong Kong                   |
| Li, Tao                | Warwick University                             |
| Li, Xi                 | Temple University                              |
| Li, Xi                 | University of Toronto                          |
| Li, Xiao-Bai           | University of Massachusetts Lowell             |
| Li, Xinxin             | University of Connecticut                      |
| Li, Xitong             | HEC Paris                                      |
| Li, Yang               | Cheung Kong Graduate School of Business        |
| Li, Yang               | University of Toronto                          |
| Li, Zhi                | Tulane University                              |
| Lian, Huiwen           | Hong Kong University of Science and Technology |
| LIAN, LEI              | University of Massachusetts Amherst            |
| Liang, Lihong          | Syracuse University                            |
| Liang, Pierre Jinghong | Carnegie Mellon University                     |
| Liao, Rose             | Rutgers University                             |
| Liao, Scott            | University of Toronto                          |
| Lieberman, Andres      | New York University                            |
| Lieberman, Matthew     | University of California, Los Angeles          |
| Lightle, John          | Virginia Commonwealth University               |
| Lim, Kwanghui          | National University of Singapore               |
| Lim, Michael           | University of Illinois at Urbana-Champaign     |
| Lim, Noah              | University of Wisconsin-Madison                |
| Lim, Sonya             | DePaul University                              |
| Lim, W. S.             | National University of Singapore               |
| Lin, Chen              | Chinese University of Hong Kong                |
| Lin, Jerchern          | University at Buffalo                          |

|                     |                                                |
|---------------------|------------------------------------------------|
| Lin, Mingfeng       | University of Arizona                          |
| Lin, Xiaoji         | The Ohio State University                      |
| Linardi, Sera       | University of Pittsburgh                       |
| Lincoln, William    | Johns Hopkins University                       |
| Linderman, Kevin    | University of Minnesota                        |
| Lindner, Florian    | University of Innsbruck                        |
| Linnainmaa, Juhani  | University of Chicago                          |
| Linton, Oliver      | University of Cambridge                        |
| Lissoni, Francesco  | Bocconi University                             |
| Litov, Lubomir      | University of Oklahoma                         |
| Liu, Ben            | City University of Hong Kong                   |
| Liu, Chengwei       | University of Warwick                          |
| Liu, Chris          | University of Toronto                          |
| Liu, De             | University of Kentucky                         |
| Liu, Dengpan        | Iowa State University                          |
| Liu, Fang           | Washington University in St. Louis             |
| Liu, Haoming        | National University of Singapore               |
| Liu, Hening         | University of Manchester                       |
| Liu, Jun            | University of California, San Diego            |
| Liu, Laura          | Peking University                              |
| Liu, Lin            | University of Central Florida                  |
| Liu, Nan            | Columbia University                            |
| Liu, Peng           | California State University, Fullerton         |
| Liu, Peng           | Cornell University                             |
| Liu, Qi             | Peking University                              |
| Liu, Qian           | Hong Kong University of Science and Technology |
| Liu, Qiao           | Peking University                              |
| Liu, Qihong         | University of Oklahoma                         |
| Liu, Tracy          | Tsinghua University                            |
| Liu, Yan            | Texas A&M University                           |
| Liu, Yong           | University of Arizona                          |
| Liu, Yunchuan       | University of Illinois at Urbana-Champaign     |
| Liu, Zhixin         | University of Michigan                         |
| Livdan, Dmitry      | University of California, Berkeley             |
| Llanes, Gaston      | Pontificia Universidad Católica de Chile       |
| Lobel, Ilan         | New York University                            |
| Lobel, Ruben        | University of Pennsylvania                     |
| Loch, Christoph     | University of Cambridge                        |
| Loewenstein, George | Carnegie Mellon University                     |
| Loewenstein, Mark   | University of Maryland                         |
| Loh, Roger          | Singapore Management University                |
| Long, Zhouyu        | Chinese University of Hong Kong                |
| López Pérez, Raúl   | Universidad Autónoma de Madrid                 |
| Lopomo, Giuseppe    | Duke University                                |
| Lou, Xiaoxia        | University of Delaware                         |
| Loualiche, Erik     | Massachusetts Institute of Technology          |
| Loughran, Tim       | Notre Dame University                          |
| Loumiotis, Maria    | University of Southern California              |
| Lovallo, Dan        | University of Sydney                           |

|                      |                                                     |
|----------------------|-----------------------------------------------------|
| Lovett, Mitch        | University of Rochester                             |
| Low, Angie           | Nanyang Technological University                    |
| Lowery, J.           | University of Texas at Austin                       |
| Lowry, Michelle      | Drexel University                                   |
| Lu, Hai              | University of Toronto                               |
| Lu, Haitian          | Hong Kong Polytechnic University                    |
| Lu, Lauren Xiaoyuan  | University of North Carolina at Chapel Hill         |
| Lu, Susan            | Purdue University                                   |
| Lu, Xin              | Cornell University                                  |
| Lu, Yingda           | Rensselaer Polytechnic Institute                    |
| Lu, Yixin            | Vrije Universiteit Amsterdam                        |
| Lu, Zhentong         | University of Wisconsin-Madison                     |
| Lu, Zhongjin         | University of Georgia                               |
| Lubin, Benjamin      | Boston University                                   |
| Lucas, Henry         | University of Maryland                              |
| Luedtke, James       | University of Wisconsin-Madison                     |
| Lundblad, Christian  | University of North Carolina at Chapel Hill         |
| Luo, Hong            | Harvard University                                  |
| Luo, Lan             | University of Southern California                   |
| Luo, Wei             | IESE Business School                                |
| Luo, Xueming         | Temple University                                   |
| Lusby, Richard       | Danish Technical University                         |
| Lyandres, Evgeny     | Boston University                                   |
| Lyle, Matthew        | Northwestern University                             |
| Lynham, John         | University of Hawaii                                |
| Lyons, Liz           | University of California, San Diego                 |
| Ma, Linlin           | Northeastern University                             |
| Ma, Liye             | University of Maryland                              |
| Ma, Xiao             | University of Arkansas                              |
| Maccheroni, Fabio    | Bocconi University                                  |
| MacDuffie, John Paul | University of Pennsylvania                          |
| Macara, Rosario      | Yale University                                     |
| MacGarvie, Megan     | Boston University                                   |
| Macher, Jeffrey      | Georgetown University                               |
| Macis, Mario         | Johns Hopkins University                            |
| Mackey, Alison       | California Polytechnic State University             |
| Macleon, Catherine   | Temple University                                   |
| Maddah, Bacerl       | American University of Beirut                       |
| Madrian, Brigitte    | Harvard University                                  |
| Maeland, Joril       | NHH Norwegian School of Economics                   |
| Magazine, Michael    | University of Cincinnati                            |
| Magee, Joe           | New York University                                 |
| Magelssen, Catherine | London Business School                              |
| Mahmoudi, Hamed      | University of Oklahoma                              |
| Maillart, Lisa       | University of Pittsburgh                            |
| Mak, Henry           | Indiana University – Purdue University Indianapolis |
| Mak, Ho-Yin          | Hong Kong University of Science and Technology      |
| Mak, Vincent         | University of Cambridge                             |
| Makadok, Richard     | Emory University                                    |

|                             |                                           |
|-----------------------------|-------------------------------------------|
| Makarov, Igor               | London Business School                    |
| Malamud, Semyon             | EPFL                                      |
| Malenko, Andrey             | Massachusetts Institute of Technology     |
| Malenko, Nadya              | Boston College                            |
| Malinova, Katya             | University of Toronto                     |
| Malkhozov, Aytak            | McGill University                         |
| Mallapragada, Girish        | Indiana University                        |
| Malter, Daniel              | Harvard University                        |
| Maltz, Amnon                | New York University                       |
| Mamani, Hamed               | University of Washington                  |
| Mamer, John                 | University of California, Los Angeles     |
| Manela, Asaf                | Washington University in St. Louis        |
| Mani, Vidya                 | Pennsylvania State University             |
| Mann, William               | University of California, Los Angeles     |
| Manso, Gustavo              | University of California, Berkeley        |
| Mao, Yifei                  | Cornell University                        |
| Marakani, Srikant           | City University of Hong Kong              |
| Marechal, Michel Andre      | University of Zurich                      |
| Marinesi, Simone            | University of Pennsylvania                |
| Marinovic, Ivan             | Stanford University                       |
| Markle, Alex                | Fordham University                        |
| Markov, Stanimir            | Southern Methodist University             |
| Marley, Tony                | University of Victoria                    |
| Marquardt, Carol            | Baruch College                            |
| Marsili, Orietta            | University of Bath                        |
| Martin, Daniel              | Paris School of Economics                 |
| Martin, Geoffrey            | University of Melbourne                   |
| Martin, Xiumin              | Washington University in St. Louis        |
| Martínez-de-Albéniz, Victor | IESE Business School                      |
| Marx, Matt                  | Massachusetts Institute of Technology     |
| Masatlioglu, Yusufcan       | University of Michigan                    |
| Masclat, David              | CNRS and Faculty of Economics Rennes1     |
| Mason, Charles              | University of Wyoming                     |
| Matejka, Michal             | Arizona State University                  |
| Matisoff, Daniel            | Georgia Institute of Technology           |
| Matos, Pedro                | University of Virginia                    |
| Matouschek, Niko            | Northwestern University                   |
| Matsa, David                | Northwestern University                   |
| Matsumoto, Dawn             | University of Washington                  |
| Maug, Ernst                 | University of Mannheim                    |
| Maurer, Thomas              | Washington University in St. Louis        |
| Mayer, Kyle                 | University of Southern California         |
| Mayew, Bill                 | Duke University                           |
| Mayock, Tom                 | Office of the Comptroller of the Currency |
| Mayzlin, Dina               | Yale University                           |
| Mazalov, Vladimir           | Karelia Research Center, RAS              |
| McCann, Brian               | Vanderbilt University                     |
| McCullough, Jeffrey         | University of Minnesota                   |
| McConnell, Margaret         | Harvard University                        |

|                         |                                                 |
|-------------------------|-------------------------------------------------|
| McDermott, Katie        | Georgetown University                           |
| McDevitt, Ryan          | University of Rochester                         |
| McDonnell, Mary-Hunter  | Georgetown University                           |
| McElheran, Kristina     | University of Toronto                           |
| McEvily, Bill           | University of Toronto                           |
| McGuire, Joseph         | University of Pennsylvania                      |
| McKenzie, Craig         | University of California, San Diego             |
| McKnight, Harrison      | Michigan State University                       |
| McLay, Laura            | University of Wisconsin-Madison                 |
| McLean, David           | University of Alberta                           |
| McWilliams, Bruce       | Instituto Tecnológico Autónomo de México (ITAM) |
| Meder, Anthony          | Binghamton University                           |
| Meer, Jonathan          | Texas A&M University                            |
| Mehra, Ajay             | University of Kentucky                          |
| Mehra, Amit             | Indian School of Business                       |
| Mehrotra, Mili          | University of Minnesota                         |
| Mehrotra, Vikas         | University of Alberta                           |
| Melessa, Samuel         | University of Iowa                              |
| Mendoza-Arriaga, Rafael | University of Texas at Austin                   |
| Menegatti, Mario        | Università di Parma                             |
| Meng, Xiaojing          | New York University                             |
| Menietti, Michael       | Harvard University                              |
| Menkhoff, Lukas         | Leibniz University of Hanover                   |
| Menon, Nirup            | George Mason University                         |
| Menon, Syam             | University of Texas at Dallas                   |
| Mergenthaler, Richard   | University of Iowa                              |
| Merkle, Edgar           | University of Missouri                          |
| Merluzzi, Jennifer      | Tulane University                               |
| Merrick, Jason          | Virginia Commonwealth University                |
| Mersereau, Adam         | University of North Carolina at Chapel Hill     |
| Meschke, Felix          | University of Kansas                            |
| Messinger, Paul         | University of Alberta                           |
| Metzger, Daniel         | Stockholm School of Economics                   |
| Meyer, Jack             | Michigan State University                       |
| Miceli, Marcia          | Georgetown University                           |
| Michas, Paul            | University of Arizona                           |
| Michenaud, Sebastien    | DePaul University                               |
| Miettinen, Topi         | Hanken School of Economics                      |
| Mihm, Jurgen            | INSEAD                                          |
| Miklós-Thal, Jeanine    | University of Rochester                         |
| Milbradt, Konstantin    | Northwestern University                         |
| Milinski, Manfred       | Max Planck Institute for Evolutionary Biology   |
| Miller, Amalia          | University of Virginia                          |
| Milner, Joseph          | University of Toronto                           |
| Minca, Andreea          | Cornell University                              |
| Mindruta, Denisa        | HEC Paris                                       |
| Minor, Dylan            | Northwestern University                         |
| Miric, Milan            | Copenhagen Business School                      |
| Misener, Ruth           | Imperial College London                         |

|                          |                                                |
|--------------------------|------------------------------------------------|
| Mishra, Abhay            | Georgia State University                       |
| Mishra, Anant            | George Mason University                        |
| Misra, Kanishka          | London Business School                         |
| Mitchell, Matthew        | University of Toronto                          |
| Mittal, Vikas            | Rice University                                |
| Mittendorf, Brian        | The Ohio State University                      |
| Mitton, Todd             | Brigham Young University                       |
| Mizik, Natalie           | University of Washington                       |
| Mkrtchyan, Anahit        | Northeastern University                        |
| Mo, Haitao               | Louisiana State University                     |
| Mo, Jiahui               | University of Texas at Dallas                  |
| Mobbs, Shawn             | University of Alabama                          |
| Mochon, Daniel           | Tulane University                              |
| Moeller, Marc            | University of Bern                             |
| Moeller, Sara            | University of Pittsburgh                       |
| Mohan, Bhavya            | Harvard University                             |
| Mohlin, Erik             | Oxford University                              |
| Mohnen, Pierre           | Maastricht University                          |
| Moinzadeh, Kamran        | University of Washington                       |
| Mollerstrom, Johanna     | George Mason University                        |
| Mollick, Ethan           | University of Pennsylvania                     |
| Mondria, Jordi           | University of North Carolina at Chapel Hill    |
| Monge-Naranjo, Alexander | Federal Reserve Bank of St. Louis              |
| Monin, Benoit            | Stanford University                            |
| Monras, Joan             | Sciences Po                                    |
| Montgomery, Alan         | Carnegie Mellon University                     |
| Montoya, Ricardo         | Columbia University                            |
| Moore, Don               | University of California, Berkeley             |
| Moran, Rani              | Tel Aviv University                            |
| Morck, Randall           | University of Alberta                          |
| Moreno-Garcia, Antonio   | Northwestern University                        |
| Morewedge, Carey         | Boston University                              |
| Moritz, Brent            | Pennsylvania State University                  |
| Morjaria, Ameet          | Northwestern University                        |
| Morrison, Alan           | University of Oxford                           |
| Mortal, Sandra           | University of Memphis                          |
| Moser, Donald            | University of Pittsburgh                       |
| Mostafa, Romel           | University of Western Ontario                  |
| Mostagir, Mohamed        | University of Michigan                         |
| Moulton, Pamela          | Cornell University                             |
| Muchnik, Lev             | New York University                            |
| Mudambi, Ram             | Temple University                              |
| Muehlegger, Erich        | University of California, Davis                |
| Mueller, Jennifer        | University of San Diego                        |
| Mueller, Wieland         | University of Vienna                           |
| Muermann, Alexander      | Vienna University of Economics and Business    |
| Mui, Vai-Lam             | Monash University                              |
| Muir, Tyler              | Yale University                                |
| Mukherjee, Abhiroop      | Hong Kong University of Science and Technology |

|                        |                                                |
|------------------------|------------------------------------------------|
| Mukherjee, Rajiv       | Southern MEthodist University                  |
| Mukherjee, Sumitra     | Nova Southeastern University                   |
| Muller, Alfred         | Universitat Siegen                             |
| Mullett, Timothy       | University of Warwick                          |
| Mullins, William       | University of Maryland                         |
| Muravyev, Dmitriy      | Boston College                                 |
| Murgoci, Agatha        | Copenhagen Business School                     |
| Murooka, Takeshi       | University of Munich                           |
| Murphy, Pamela         | Queen's University                             |
| Musalem, Andres        | Duke University                                |
| Muslu, Volkan          | University of Houston                          |
| Muthulingam, Suresh    | Pennsylvania State University                  |
| Muthuraman, Kumar      | University of Texas at Austin                  |
| Myers, James           | University of Arkansas                         |
| Myers, Linda           | University of Arkansas                         |
| Nachum, lilac          | Baruch College                                 |
| Nadar, Emre            | Bilkent University                             |
| Nadauld, Taylor        | Brigham Young University                       |
| Nadine, Fleischhut     | Max Planck Institute for Human Development     |
| Naecker, Jeffrey       | Wesleyan University                            |
| Nagaraj, Abhishek      | Massachusetts Institute of Technology          |
| Nagle, Frank           | University of Southern California              |
| Naik, Prasad           | University of California, Davis                |
| Najafi-Asadolahi, Sami | Santa Clara University                         |
| Nambisan, Satish       | University of Wisconsin-Milwaukee              |
| Nan, Lin               | Carnegie Mellon University                     |
| Nan, Ning              | University of British Columbia                 |
| Nanda, Dhananjay       | University of Miami                            |
| Nanda, Ramana          | Harvard University                             |
| Nandy, Debarshi        | Brandeis University                            |
| Narasimhan, Om         | London School of Economics                     |
| Narayanamoorthy, Gans  | Tulane University                              |
| Narayanan, Sridhar     | Stanford University                            |
| Narayanan, Sriram      | Michigan State University                      |
| Nardotto, Mattia       | University of Cologne                          |
| Nasiry, Javad          | Hong Kong University of Science and Technology |
| Natarajan, Karthik     | Singapore University of Technology and Design  |
| Natividad, Gabriel     | Universidad de Piura                           |
| Natter, Martin         | Goethe University of Frankfurt                 |
| Nau, Robert            | Duke University                                |
| Navone, Marco          | University of Technology Sydney                |
| Nazerzadeh, Hamid      | University of Southern California              |
| Neckermann, Susanne    | Centre for European Economic Research          |
| Negoescu, Diana        | University of Minnesota                        |
| Negro, Giacomo         | Emory University                               |
| Neilson, William       | University of Tennessee                        |
| Nelson, Barry          | Northwestern University                        |
| Nelson, Thomas         | The Ohio State University                      |
| Nembhard, Ingrid       | Yale University                                |

|                       |                                                    |
|-----------------------|----------------------------------------------------|
| Netzer, Oded          | Columbia University                                |
| Neuberger, Anthony    | City University London                             |
| Neufeld, Derrick      | University of Western Ontario                      |
| Nevskaya, Yulia       | Washington University in St. Louis                 |
| Newman, George        | Yale University                                    |
| Ng, David             | Cornell University                                 |
| Nguyen, Bang          | Cambridge University                               |
| Nguyen, Dan           | University of Chicago                              |
| Nguyen, Giang         | Pennsylvania State University                      |
| Nguyen, Quoc          | University of Illinois at Chicago                  |
| Nguyen, Thanh         | Purdue University                                  |
| Ni, Jian              | Johns Hopkins University                           |
| Nian, Tingting        | New York University                                |
| Nicklisch, Andreas    | University of Hamburg                              |
| Niculescu, Marius     | Georgia Institute of Technology                    |
| Nielsen, Kasper       | Hong Kong University of Science and Technology     |
| Niessen, Alexandra    | University of Mannheim                             |
| Niessner, Marina      | Yale University                                    |
| Nikolaev, Valeri      | University of Chicago                              |
| Nikolov, Boris        | University of Rochester                            |
| Nin, Jordi            | Polytechnic University of Catalonia                |
| Nini, Greg            | Drexel University                                  |
| Nitzan, Irit          | Tel Aviv University                                |
| Nocetti, Diego        | Clarkson University                                |
| Noe, Thomas           | University of Oxford                               |
| Nohel, Tom            | Loyola University                                  |
| Normann, Hans-Theo    | University of Düsseldorf                           |
| Norton, Michael       | Harvard University                                 |
| Nosenzo, Daniele      | University of Nottingham                           |
| Nosko, Chris          | University of Chicago                              |
| Noussair, Charles     | Tilburg University                                 |
| Novemsky, Nathan      | Yale University                                    |
| Obloj, Tomasz         | INSEAD                                             |
| O'Brien, Daniel       | U.S. Federal Trade Commission                      |
| O'Connor, Kathleen    | Cornell University                                 |
| Oechssler, Joerg      | University of Heidelberg                           |
| Oehmke, Martin        | Columbia University                                |
| Oemke, Martin         | Columbia University                                |
| Oettl, Alexander      | Georgia Institute of Technology                    |
| Offerman, Theo        | University of Amsterdam                            |
| Officer, Micah        | Loyola Marymount University                        |
| Ogneva, Maria         | University of Southern California                  |
| Ogryczak, Włodzimierz | Warsaw University of Technology                    |
| Oh, Jaelynn           | University of Utah                                 |
| Oh, Jeong-ha          | Georgia State University                           |
| Oh, Joo Hee           | Massachusetts Institute of Technology              |
| Oh, Wonseok           | Korea Advanced Institute of Science and Technology |
| O'Hair, Allison       | Massachusetts Institute of Technology              |
| Okada, Erica          | Hitotsubashi University                            |

|                             |                                                  |
|-----------------------------|--------------------------------------------------|
| Olivares, Marcelo           | Columbia University                              |
| Olivola, Christopher        | Carnegie Mellon University                       |
| Olsen, Tava                 | University of Auckland                           |
| Oncüler, Ayse               | ESSEC                                            |
| Onderstal, Sander           | University of Amsterdam                          |
| Ongena, Steven              | University of Zurich                             |
| Oprea, Ryan                 | University of British Columbia                   |
| Orhun, A. Yesim             | University of Michigan                           |
| Ormiston, Margaret          | London Business School                           |
| Ortega, Claudia             | World Bank                                       |
| Ortega, Jaime               | Universidad Carlos III de Madrid                 |
| Ortiz-Molina, Hernan        | University of British Columbia                   |
| Ortoleva, Pietro            | Columbia University                              |
| Orzen, Henrik               | University of Mannheim                           |
| Osadchiy, Nikolay           | Emory University                                 |
| Osambela, Emilio            | Carnegie Mellon University                       |
| Osborne, Matthew            | University of Toronto                            |
| Osorio, Carolina            | Massachusetts Institute of Technology            |
| Østerdal, Lars Peter        | University of Southern Denmark                   |
| Ostler, James               | University of California, Los Angeles            |
| Otter, Thomas               | Goethe University of Frankfurt                   |
| Otto, Clemens               | HEC Paris                                        |
| Ovchinnikov, Anton          | Queen's University                               |
| Oveis, Christopher          | University of California, San Diego              |
| Overby, Eric                | Georgia Institute of Technology                  |
| Ovtchinnikov, Alexei        | HEC Paris                                        |
| Owen-Smith, Jason           | University of Michigan                           |
| Ozbas, Oguzhan              | University of Southern California                |
| Ozbay, Erkut                | University of Maryland                           |
| Ozel, Naim Bugra            | University of Texas at Dallas                    |
| Pachamanova, Dessislava     | Babson College                                   |
| Pacheco-de-Almeida, Goncalo | New York University                              |
| Page, Jeremy                | Brigham Young University                         |
| Pagliari, Mario             | Collegio Carlo Alberto                           |
| Paharia, Neeru              | Georgetown University                            |
| Paik, Yongwook              | University of Southern California                |
| Painter, Gary               | University of Southern California                |
| Palazzo, Berardino          | Boston University                                |
| Pallais, Amanda             | Harvard University                               |
| Palley, Asa                 | Duke University                                  |
| Palma, Marco                | Texas A&M University                             |
| Palmer, Christopher         | University of California, Berkeley               |
| Palomino, Francisco         | Board of Governors of the Federal Reserve System |
| Pan, Jessica                | National University of Singapore                 |
| Pan, Xiajun                 | University of Florida                            |
| Panageas, Stavros           | University of Chicago                            |
| Panayides, Marios           | University of Pittsburgh                         |
| Panayotov, George           | Hong Kong University of Science and Technology   |
| Pandit, Shail               | University of Illinois at Chicago                |

|                         |                                             |
|-------------------------|---------------------------------------------|
| Pang, Min-Seok          | Temple University                           |
| Pang, Zhan              | Lancaster University                        |
| Panico, Claudio         | Bocconi University                          |
| Pant, Gautam            | University of Iowa                          |
| Papaioannou, Elias      | London Business School                      |
| Pareek, Ankur           | Rutgers University                          |
| Park, Minjung           | University of California, Berkeley          |
| Park, So-Eun            | University of British Columbia              |
| Park, Sun Hyun          | Seoul National University                   |
| Park, Young-Hoon        | Cornell University                          |
| Parker, Christopher     | Pennsylvania State University               |
| Parlaktürk, Ali         | University of North Carolina at Chapel Hill |
| Parsons, Christopher    | University of California, San Diego         |
| Pataconi, Andrea        | University of East Anglia                   |
| Patatoukas, Panos       | University of California, Berkeley          |
| Pathak, Praveen         | University of Florida                       |
| Pauwels, Koen           | Ozyegin University                          |
| Pavlin, Michael         | Wilfrid Laurier University                  |
| Pavlou, Paul            | Temple University                           |
| Pavlov, Gregory         | University of Western Ontario               |
| Pavlov, Valery          | University of Auckland                      |
| Pawlina, Grzegorz       | Lancaster University                        |
| Pazgal, Amit            | Rice University                             |
| Pearcy, Jason           | Montana State University                    |
| Peis, Britta            | RWTH Aachen University                      |
| Pekeč, Saša             | Duke University                             |
| Pelizzon, Loriana       | Università Ca' Foscari di Venezia           |
| Pelletier, Denis        | North Carolina State University             |
| Penalva, Fernando       | University of Navarra                       |
| Peng, Ann               | Western University                          |
| Peng, Jiming            | University of Houston                       |
| Peng, Jing              | University of Pennsylvania                  |
| Peng, Lin               | Baruch College                              |
| Peres, Renana           | Hebrew University of Jerusalem              |
| Perez-Castrillo, David  | Universidad Autonoma de Barcelona           |
| Petacchi, Reining       | Massachusetts Institute of Technology       |
| Petersen, Bruno         | Washington University in St. Louis          |
| Petrie, Ragan           | George Mason University                     |
| Petruzzi, Nicholas      | Pennsylvania State University               |
| Pettibone, Jonathan     | Southern Illinois University Edwardsville   |
| Pettit, Nathan          | New York University                         |
| Peysakhovich, Alexander | Facebook                                    |
| Pfetsch, Marc           | Zuse Institute Berlin                       |
| Pham, Huyen             | University of Paris Diderot                 |
| Phan, Tuan              | National University of Singapore            |
| Phillips, Damon         | Columbia University                         |
| Phillips, Gordon        | University of Southern California           |
| Pierce, Lamar           | Washington University in St. Louis          |
| Piezunka, Henning       | INSEAD                                      |

|                        |                                                |
|------------------------|------------------------------------------------|
| Pinter, Brad           | Pennsylvania State University                  |
| Piotroski, Joseph      | Stanford University                            |
| Piovesan, Marco        | University of Copenhagen                       |
| Placido, Laetitia      | Baruch College                                 |
| Plassman, Hilke        | INSEAD                                         |
| Plazzi, Alberto        | University of Lugano                           |
| Pleskac, Timothy       | Michigan State University                      |
| Ploner, Matteo         | University of Trento                           |
| Plosser, Matthew       | Federal Reserve Bank of New York               |
| Plyakha, Yuliya        | House of Finance                               |
| Poblete, Joaquin       | Pontificia Universidad Católica de Chile       |
| Pogrebna, Ganna        | University of Warwick                          |
| Polites, Greta         | Kent State University                          |
| Polkovnichenko, Valery | Federal Reserve Board                          |
| Pomorski, Lukasz       | University of Toronto                          |
| Pontikes, Elizabeth    | University of Chicago                          |
| Popadak, Jillian       | Duke University                                |
| Pope, Devin            | University of Chicago                          |
| Post, Thierry          | Koç University                                 |
| Postek, Krzysztof      | Tilburg University                             |
| Pothos, Emmanuel       | City University London                         |
| Potters, Jan           | Tilburg University                             |
| Povel, Paul            | University of Houston                          |
| Powell, E. Erin        | Clemson University                             |
| Powell, Mike           | Northwestern University                        |
| Pozner, Jo-Ellen       | University of California, Berkeley             |
| Prabhala, Nagpurnanand | University of Maryland                         |
| Prabhat, Saumya        | Indian School of Business                      |
| Prabhu, Jaideep        | University of Cambridge                        |
| Prasad, Ashutosh       | University of Texas at Dallas                  |
| Prat, Andrea           | Columbia University                            |
| Preston, David         | Texas Christian University                     |
| Previtero, Alessandro  | University of Western Ontario                  |
| Price, Michael         | Georgia State University                       |
| Prieger, Jim           | Pepperdine University                          |
| Prince, Jeffrey        | Indiana University                             |
| Prowse, Victoria       | Cornell University                             |
| Puckett, Andy          | University of Tennessee                        |
| Pugsley, Benjamin      | University of Chicago                          |
| Pukthuanthong, Kuntara | University of Missouri                         |
| Purnanandam, Amiyatosh | University of Michigan                         |
| Puterman, Martin       | University of British Columbia                 |
| Qi, Anyan              | University of Texas at Dallas                  |
| Qi, Xiangtong          | Hong Kong University of Science and Technology |
| Qian, Jun              | Shanghai Advanced Institute of Finance         |
| Qian, Wenlan           | National University of Singapore               |
| Qian, Yi               | National Bureau of Economic Research           |
| Qin, Cheng-Zhong       | University of California, Santa Barbara        |
| Qiu, Jianying          | University of Innsbruck                        |

|                         |                                              |
|-------------------------|----------------------------------------------|
| Qiu, Jiaping            | McMaster University                          |
| Qiu, Liangfei           | University of Florida                        |
| Quah, John              | Oxford University                            |
| Quintane, Eric          | University of Los Andes                      |
| Quintin, Erwan          | University of Wisconsin-Madison              |
| Raab, Markus            | German Sport University Cologne              |
| Radhakrishnan, Suresh   | University of Texas at Dallas                |
| Raghunathan, Srinivasan | University of Texas at Dallas                |
| Rahman, Mohammad        | Purdue University                            |
| Rahmani, Morvarid       | Georgia Institute of Technology              |
| Rakow, Tim              | King's College London                        |
| Ramachandran, Karthik   | Georgia Institute of Technology              |
| Ramachandran, Vandana   | University of Utah                           |
| Ramalingegowda, Santosh | University of Georgia                        |
| Ramanan, Ram            | University of California, Davis              |
| Ramaprasad, Jui         | McGill University                            |
| Ramarajan, Lakshmi      | Harvard University                           |
| Rand, David             | Yale University                              |
| Rand, William           | University of Maryland                       |
| Randhawa, Ramandeep     | University of Southern California            |
| Ranehill, Eva           | University of Zurich                         |
| Ranjan, Roopesh         | GE Global Research                           |
| Rao, Anita              | Stanford University                          |
| Rao, Gautam             | Harvard University                           |
| Rao, Justin             | Microsoft Research                           |
| Rapson, David           | University of California, Davis              |
| Ravichandran, T         | Rensselaer Polytechnic Institute             |
| Ray, Gautam             | University of Minnesota                      |
| Ray, Korok              | Texas A&M University                         |
| Read, Daniel            | Durham University                            |
| Reagans, Ray            | Massachusetts Institute of Technology        |
| Recalde, Maria          | International Food Policy Research Institute |
| Reeb, David             | National University of Singapore             |
| Reed, Adam              | University of North Carolina at Chapel Hill  |
| Reed, Joshua            | New York University                          |
| Rees, Laura             | Vanderbilt University                        |
| Rees-Jones, Alex        | Cornell University                           |
| Regenwetter, Michel     | University of Illinois at Urbana-Champaign   |
| Reggiani, Tommaso       | University of Cologne                        |
| Rego, Sonja             | Indiana University                           |
| Reguant, Mar            | Stanford University                          |
| Reichstein, Toke        | Copenhagen Business School                   |
| Reimers, Imke           | Northeastern University                      |
| Reisinger, Markus       | Frankfurt School of Finance and Management   |
| Reme, Bjørn-Atle        | Telenor Research                             |
| Ren, Yufei              | Union College                                |
| Renneboog, Luc          | Tilburg University                           |
| Renner, Elke            | University of Nottingham                     |
| Rennhoff, Adam          | Middle Tennessee State University            |

|                        |                                       |
|------------------------|---------------------------------------|
| Repullo, Rafael        | CEMFI                                 |
| Rerup, Claus           | University of Western Ontario         |
| Resutek, Robert        | University of Georgia                 |
| Reuben, Ernesto        | Columbia University                   |
| Reuter, Jonathan       | Boston College                        |
| Rey Biel, Pedro        | Universitat Autònoma de Barcelona     |
| Rhee, Mooweon          | Yonsei University                     |
| Rhodes-Kropf, Matthew  | Harvard University                    |
| Rhonesmith, Jonathan   | Harvard University                    |
| Richter, Brian         | University of Texas at Austin         |
| Rick, Scott            | University of Michigan                |
| Riddel, Mary           | University of Nevada, Las Vegas       |
| Rider, Christopher     | Georgetown University                 |
| Ridley, David          | Duke University                       |
| Riedl, Arno            | Maastricht University                 |
| Riedl, Christoph       | Northeastern University               |
| Riener, Gerhard        | University of Düsseldorf              |
| Rieskamp, Joerg        | University of Basel                   |
| Rietz, Thomas          | University of Iowa                    |
| Righter, Rhonda        | University of California, Berkeley    |
| Ris, Jason             | University of Pennsylvania            |
| Rindisbacher, Marcel   | Boston University                     |
| Ringgenberg, Matthew   | Washington University in St. Louis    |
| Riordan, Ryan          | Queen's University                    |
| Rios, Luis             | Duke University                       |
| Risen, Jane            | University of Chicago                 |
| Ritchken, Peter        | Case Western Reserve University       |
| Rivera, Alejandro      | Boston University                     |
| Roach, Michael         | Cornell University                    |
| Roberts, John          | London Business School                |
| Robinson, David        | Duke University                       |
| Robinson, John         | University of Texas at Austin         |
| Robotti, Cesare        | Imperial College London               |
| Rock, Daniel           | Massachusetts Institute of Technology |
| Rockart, Scott         | Duke University                       |
| Rockenbach, Bettina    | University of Cologne                 |
| Rodriguez, Marius      | Federal Reserve Board                 |
| Rodriguez-Lara, Ismael | Middlesex University                  |
| Roels, Guillaume       | University of California, Los Angeles |
| Roende, Thomas         | Copenhagen Business School            |
| Roesch, Dominik        | University at Buffalo                 |
| Roese, Neal            | Northwestern University               |
| Rogan, Michelle        | INSEAD                                |
| Rogers, Jonathan       | University of Colorado                |
| Rogers, Todd           | Harvard University                    |
| Rohde, Kirsten         | Erasmus University                    |
| Roin, Ben              | Massachusetts Institute of Technology |
| Romanosky, Sasha       | RAND Corporation                      |
| Romero, Gonzalo        | University of Toronto                 |

|                          |                                             |
|--------------------------|---------------------------------------------|
| Romley, John             | University of Southern California           |
| Rompolis, Leonidas       | Athens University of Economics and Business |
| Rong, Ying               | Shanghai Jiao Tong University               |
| Rooderkerk, Robert       | Erasmus University                          |
| Rosato, Antonio          | University of Technology Sydney             |
| Rosazza Gianin, Emanuela | University of Milan                         |
| Rosell, Carlos           | Finance Canada                              |
| Rosen, Richard           | Federal Reserve Bank of Chicago             |
| Rosenzweig, Eve          | Emory University                            |
| Ross, David              | University of Florida                       |
| Rossi, Alberto           | University of Maryland                      |
| Rossi, Stefano           | Purdue University                           |
| Rosu, Ioanid             | HEC Paris                                   |
| Rothschild, David        | Yahoo! Research                             |
| Rottenstreich, Yuval     | University of California, San Diego         |
| Rountree, Brian          | Rice University                             |
| Roy, Raja                | Northeastern Illinois University            |
| Roychowdhury, Sugata     | Boston College                              |
| Royer, Heather           | University of California, Santa Barbara     |
| Rua, Antonio             | Banco de Portugal                           |
| Rubel, Olivier           | University of California, Davis             |
| Rubineau, Brian          | McGill University                           |
| Rui, Huaxia              | University of Rochester                     |
| Ruiz-Aliseda, Francisco  | Pontificia Universidad Católica de Chile    |
| Russell, Gary            | University of Iowa                          |
| Rustichini, Aldo         | University of Minnesota                     |
| Rutström, Elisabet       | Georgia State University                    |
| Ryall, Michael           | University of Toronto                       |
| Ryan, Matthew            | Auckland University of Technology           |
| Ryan, Stephen            | University of Texas at Austin               |
| Ryans, James             | University of California, Berkeley          |
| Rysman, Marc             | Boston University                           |
| Rytchkov, Oleg           | Temple University                           |
| Ryvkin, Dmitry           | Florida State University                    |
| Ryzhov, Ilya             | University of Maryland                      |
| Sabac, Florin            | University of Alberta                       |
| Saban, Daniela           | Stanford University                         |
| Sadka, Gil               | University of Texas at Dallas               |
| Sadrieh, Abdolkarim      | University of Magdeburg                     |
| Sadun, Raffaella         | Harvard University                          |
| Saghafian, Soroush       | Harvard University                          |
| Saglam, Mehmet           | Princeton University                        |
| Sahin, Ozge              | Johns Hopkins University                    |
| Sahni, Navdeep           | Stanford University                         |
| Said, Maher              | New York University                         |
| Saidi, Farzad            | University of Cambridge                     |
| Sainathan, Arvind        | Nanyang Technological University            |
| Saint-Jacques, Guillaume | Massachusetts Institute of Technology       |
| Sajeesh, Sajeesh         | Baruch College                              |

|                       |                                                  |
|-----------------------|--------------------------------------------------|
| Sakharov, Arkadiy     | University of Pennsylvania                       |
| Salanié, François     | Toulouse School of Economics                     |
| Salas, Eduardo        | Rice University                                  |
| Saldanha, Terence     | Washington State University                      |
| Salin, Victoria       | Texas A&M University                             |
| Saltelli, Andrea      | University of Bergen                             |
| Samek, Anya           | University of Wisconsin-Madison                  |
| Samila, Sampsa        | National University of Singapore                 |
| Sampat, Bhaven        | Columbia University                              |
| Sandås, Patrik        | University of Virginia                           |
| Sandberg, Anna        | Institute for International Economic Studies     |
| Sandikci, Burhaneddin | University of Chicago                            |
| Sangiorgi, Francesco  | Stockholm School of Economics                    |
| Santalo, Juan         | IE Business School                               |
| Santos, Carlos        | Nova School of Business and Economics            |
| Santos-Pinto, Luis    | University of Lausanne                           |
| Sanyal, Pallab        | George Mason University                          |
| Saraf, Nilesh         | Simon Fraser University                          |
| Sathre, Morten        | Norwegian School of Economics                    |
| Sauermann, Henry      | Georgia Institute of Technology                  |
| Saunders, Adam        | University of British Columbia                   |
| Saure, Denis          | University of Pittsburgh                         |
| Sausgruber, Rupert    | University of Innsbruck                          |
| Savaskan, Canan       | Northwestern University                          |
| Savor, Pavel          | Temple University                                |
| Savov, Alexi          | New York University                              |
| Savva, Nicos          | London Business School                           |
| Sayedi, Amin          | University of Washington                         |
| Sayman, Serdar        | Koç University                                   |
| Scaillet, Olivier     | University of Geneva and Swiss Finance Institute |
| Scarsini, Marco       | LUISS                                            |
| Schallheim, James     | University of Utah                               |
| Schechter, Laura      | University of Wisconsin-Madison                  |
| Schenone, Carola      | University of Virginia                           |
| Scherbina, Anna       | University of California, Davis                  |
| Schilbach, Frank      | Massachusetts Institute of Technology            |
| Schill, Michael       | University of Virginia                           |
| Schlag, Karl          | University of Vienna                             |
| Schlesinger, Harris   | University of Alabama                            |
| Schmalz, Martin       | University of Michigan                           |
| Schmidt, Andrew       | North Carolina State University                  |
| Schmidt, Tobias       | German Institute for Economic Research           |
| Schmidt, Ulrich       | University of Kiel                               |
| Schmidt, William      | Cornell University                               |
| Schmutzler, Armin     | University of Zurich                             |
| Schneider, Frederic   | University of Zurich                             |
| Schoenherr, David     | London Business School                           |
| Scholten, Marc        | Universidade Europeia                            |
| Scholtes, Stefan      | University of Cambridge                          |

|                              |                                                |
|------------------------------|------------------------------------------------|
| Schonlau, Rob                | Brigham Young University                       |
| Schram, Arthur               | Amsterdam School of Economics                  |
| Schroder, Mark               | Michigan State University                      |
| Schuerhoff, Norman           | University of Lausanne                         |
| Schulte-Mecklenbeck, Michael | Max Planck Institute for Human Development     |
| Schultheiss, Oliver          | Friedrich-Alexander University                 |
| Schultz, Kenneth             | Air Force Institute of Technology              |
| Schulz, Andreas              | Massachusetts Institute of Technology          |
| Schurer, Stefanie            | University of Sydney                           |
| Schwartz, Eric               | University of Michigan                         |
| Schwartz, Steven             | Binghamton University                          |
| Schwarz, Chris               | University of California, Irvine               |
| Schweidel, David             | Emory University                               |
| Schwenkler, Gustavo          | Boston University                              |
| Schwerter, Frederik          | University of Bonn                             |
| Schwienbacher, Armin         | Universite Lille 2                             |
| Scott, Erin                  | National University of Singapore               |
| Seamans, Robert              | New York University                            |
| Sebald, Alexander            | University of Copenhagen                       |
| Sefton, Martin               | University of Nottingham                       |
| Segal, Carmit                | University of Zurich                           |
| Seidel, Marc-David           | University of British Columbia                 |
| Seiler, Stephan              | Stanford University                            |
| Selove, Matthew              | University of Southern California              |
| Sen, Rik                     | Hong Kong University of Science and Technology |
| Sen, Soumya                  | University of Minnesota                        |
| Sensoy, Berk                 | The Ohio State University                      |
| Serafeim, George             | Harvard University                             |
| Serra, Danila                | Southern Methodist University                  |
| Serra-Garcia, Marta          | University of California, San Diego            |
| Serrano, Carlos              | Universitat Pompeu Fabra                       |
| Sertsios, Giorgo             | Universidad de los Andes                       |
| Servaes, Henri               | London Business School                         |
| Severino, Felipe             | Dartmouth College                              |
| Sevilir, Merih               | Indiana University                             |
| Seybert, Nick                | University of Maryland                         |
| Shaffer, Greg                | University of Rochester                        |
| Shah, Rachna                 | University of Minnesota                        |
| Shalev, Ron                  | New York University                            |
| Shamir, Noam                 | Tel Aviv University                            |
| Shane, Scott                 | Case Western Reserve University                |
| Shankar, Ramesh              | University of Connecticut                      |
| Shao, Pei                    | University of Lethbridge                       |
| Shapiro, Bradley             | University of Chicago                          |
| Shapiro, Joel                | University of Oxford                           |
| Sharkey, Amanda              | University of Chicago                          |
| Sharp, Nathan                | Texas A&M University                           |
| Shaw, Jason                  | Hong Kong Polytechnic University               |
| Shechter, Steven             | University of British Columbia                 |

|                     |                                            |
|---------------------|--------------------------------------------|
| Shelef, Ori         | Stanford University                        |
| Shen, Kailing       | Xiamen University                          |
| Shen, Qiaowei       | University of Pennsylvania                 |
| Shen, Siqian        | University of Michigan                     |
| Shepardson, Marcy   | Indiana University                         |
| Shepherd, Dean      | Indiana University                         |
| Sheremeta, Roman    | Case Western Reserve University            |
| Shestakova, Natalia | University of Vienna                       |
| Shi, Cong           | University of Michigan                     |
| Shi, Mengze         | University of Toronto                      |
| Shi, Pengyi         | Purdue University                          |
| Shi, Xinzheng       | Tsinghua University                        |
| Shi, Zhan           | Arizona State University                   |
| Shih, Michael S.H.  | University of Windsor                      |
| Shiller, Ben        | University of Pennsylvania                 |
| Shin, Hyoduk        | University of California, San Diego        |
| Shin, Jihae         | University of Pennsylvania                 |
| Shin, Jiwoong       | Yale University                            |
| Shin, Taekjin       | University of Illinois at Urbana-Champaign |
| Shin, Woochoel      | University of Florida                      |
| Shive, Sophie       | University of Notre Dame                   |
| Shivendu, Shivendu  | University of South Florida                |
| Shore, Jesse        | Boston University                          |
| Shriver, Scott      | Columbia University                        |
| Shroff, Nemit       | University of Michigan                     |
| Shu, Lisa           | London Business School                     |
| Shu, Pian           | Harvard University                         |
| Shu, Susan          | Boston College                             |
| Shu, Suzanne        | University of California, Los Angeles      |
| Shu, Tao            | University of Georgia                      |
| Shue, Kelly         | University of Chicago                      |
| Shulman, Jeffrey    | University of Washington                   |
| Shunko, Masha       | University of Washington                   |
| Siegel, Jordan      | University of Michigan                     |
| Siegel, Stephan     | University of Washington                   |
| Siemens, Enno       | University of Minnesota                    |
| Silva, Rui          | London Business School                     |
| Silverman, Brian    | University of Toronto                      |
| Simcoe, Timothy     | Boston University                          |
| Simeonova, Emilia   | Johns Hopkins University                   |
| Simin, Timothy      | Pennsylvania State University              |
| Simintzi, Elena     | University of British Columbia             |
| Simmons, Joseph     | University of Pennsylvania                 |
| Simmons, Robert     | Lancaster University                       |
| Simon, Jay          | Naval Postgraduate School                  |
| Simonov, Andrei     | Michigan State University                  |
| Sims, Jonathan      | Babson College                             |
| Simsek, A. Serdar   | University of Texas at Dallas              |
| Simutin, Mikhail    | University of Toronto                      |

|                         |                                                  |
|-------------------------|--------------------------------------------------|
| Sine, Wesley            | Cornell University                               |
| Singh, Harpreet         | University of Texas at Dallas                    |
| Singh, Jasjit           | INSEAD                                           |
| Sinha, Atish            | University of Wisconsin-Milwaukee                |
| Sinha, Kingshuk         | University of Minnesota                          |
| Sinitsyn, Maxim         | University of California, San Diego              |
| Siriviriyakul, Jackie   | Baruch College                                   |
| Sivanathan, Niro        | London Business School                           |
| Sivaramakrishnan, Shiva | Rice University                                  |
| Skoulakis, Georgios     | University of British Columbia                   |
| Skouras, Spyros         | Athens University of Economics and Business      |
| Skreta, Vasiliki        | New York University                              |
| slemrod, joel           | University of Michigan                           |
| Sliwka, Dirk            | University of Cologne                            |
| Slonim, Robert          | University of Sydney                             |
| Smeets, Paul            | Maastricht University                            |
| Smilowitz, Karen        | Northwestern University                          |
| Smith, Edward           | Northwestern University                          |
| Smith, Erin             | University of Rochester                          |
| Smith, J. Cole          | University of Florida                            |
| Smith, Michael          | Boston University                                |
| Smith-Crowe, Kristin    | Boston University                                |
| Snijders, Tom           | Oxford University                                |
| Snow, Daniel            | Brigham Young University                         |
| Snow , Arthur (Art) A.  | University of Georgia                            |
| Snyder, Jason           | University of California, Los Angeles            |
| Snyder, Larry           | Lehigh University                                |
| So, Anthony             | Chinese University of Hong Kong                  |
| So, Eric                | Massachusetts Institute of Technology            |
| Soderbery, Anson        | Purdue University                                |
| Sojourner, Aaron        | University of Minnesota                          |
| Soll, Jack              | Duke University                                  |
| Solomon, David          | University of Southern California                |
| Soltes, Eugene          | Harvard University                               |
| Soman, Dilip            | University of Toronto                            |
| Sommer, Svenja          | HEC Paris                                        |
| Song, Changcheng        | National University of Singapore                 |
| Song, Fenghua           | Pennsylvania State University                    |
| Song, Miao              | University of Hong Kong                          |
| Song, Yingda            | University of Science and Technology             |
| Song, Zhaogang          | Board of Governors of the Federal Reserve System |
| Sonnier, Garrett        | University of Texas at Austin                    |
| Sørensen, Erik          | NHH Norwegian School of Economics                |
| Sosa, M. Lourdes        | London Business School                           |
| Sosa, Manuel            | INSEAD                                           |
| Sosic, Greys            | University of Southern California                |
| Sosyura, Denis          | University of Michigan                           |
| Souza, Gilvan           | Indiana University                               |
| Spaenjers, Christophe   | HEC Paris                                        |

|                       |                                              |
|-----------------------|----------------------------------------------|
| Spaeth, Sebastian     | University of Hamburg                        |
| Spalt, Oliver         | Tilburg University                           |
| Spaulding, Trent      | Appalachian State University                 |
| Spicer, Andrew        | University of South Carolina                 |
| Spiegel, Matthew      | Yale University                              |
| Spiller, Stephen      | University of California, Los Angeles        |
| Sprenger, Charles     | Stanford University                          |
| Srinivasan, Anand     | National University of Singapore             |
| Sriram, S.            | University of Michigan                       |
| Srivastava, Sameer    | Harvard University                           |
| Staats, Bradley       | University of North Carolina at Chapel Hill  |
| Stallaert, Jan        | University of Connecticut                    |
| Stanfield, Jared      | University of New South Wales                |
| Stango, Victor        | University of California, Davis              |
| Stanton, Christopher  | University of Utah                           |
| Starc, Amanda         | University of Pennsylvania                   |
| Starr, Evan           | University of Michigan                       |
| Stathopoulos, Andreas | University of Southern California            |
| Stecher, Jack         | Carnegie Mellon University                   |
| Steenburgh, Thomas    | University of Virginia                       |
| Stefanescu, Irina     | Federal Reserve Board                        |
| Steffen, Sascha       | European School of Management and Technology |
| stehr, mark           | Drexel University                            |
| Stein, Luke           | Arizona State University                     |
| Steinwender, Claudia  | Harvard University                           |
| Stephenson, Matt      | Columbia University                          |
| Sterling, Adina       | Washington University in St. Louis           |
| Stern, Ariel          | Harvard University                           |
| Stieglitz, Nils       | Frankfurt School of Finance and Management   |
| Stine, Robert         | University of Pennsylvania                   |
| Stock, Axel           | University of Central Florida                |
| Stocken, Phillip      | Dartmouth College                            |
| Stoffman, Noah        | Indiana University                           |
| Stoikov, Sasha        | Cornell University                           |
| Stolletz, Raik        | University of Mannheim                       |
| Stone, Daniel         | Bowdoin College                              |
| Stott, Henry          | University College London                    |
| Stoughton, Neal       | Vienna University of Economics and Business  |
| Strausz, Roland       | Humboldt Universität                         |
| Strobl, Eric          | Ecole Polytechnique                          |
| Strobl, Günter        | Frankfurt School of Finance and Management   |
| Stroebe, Johannes     | New York University                          |
| Stromberg, Per        | Stockholm School of Economics                |
| Stroube, Bryan        | University of Maryland                       |
| Strumpf, Koleman      | University of Kansas                         |
| Stuart, Colleen       | Johns Hopkins University                     |
| Stutzer, Alois        | University of Basel                          |
| Su, Che-Lin           | University of Chicago                        |
| Subasi, Musa          | University of Maryland                       |

|                            |                                             |
|----------------------------|---------------------------------------------|
| Subramaniam, Ramanathan    | Indian Institute of Management              |
| Subramanian, Ajay          | Georgia State University                    |
| Subramanian, Krishnamurthy | Indian School of Business                   |
| Subramanian, Ravi          | Georgia Institute of Technology             |
| Subramanian, Upender       | University of Texas at Dallas               |
| Suetens, Sigrid            | Tilburg University                          |
| Suijs, Jeroen              | Tilburg University                          |
| Suk, Inho                  | University at Buffalo                       |
| Sul, Donggyu               | University of Texas at Dallas               |
| Sulaeman, Johan            | National University of Singapore            |
| Sun, Heshan                | Clemson University                          |
| Sun, Jie                   | National University of Singapore            |
| Sun, Monic                 | Boston University                           |
| Sun, Peng                  | Duke University                             |
| Sun, Tianshu               | University of Maryland                      |
| Sun, Yacheng               | University of Colorado at Boulder           |
| sun, yang                  | University of Hong Kong                     |
| Sun, Yuan                  | Boston University                           |
| Sun, Zheng                 | University of California, Irvine            |
| Sunar, Nur                 | University of North Carolina at Chapel Hill |
| Sundaram, Rangarajan       | New York University                         |
| Sunde, Uwe                 | University of Munich                        |
| Sunder, Jayanthi           | University of Arizona                       |
| Sunder, Shyam              | University of Arizona                       |
| Sunder, Shyam              | Yale University                             |
| Sunderam, Adi              | Harvard University                          |
| Sung, Jaeyoung             | Ajou University                             |
| Suominen, Matti            | Aalto University                            |
| Sussman, Abigail           | University of Chicago                       |
| Sutter, Matthias           | University of Innsbruck                     |
| Sutton, Steve              | University of Central Florida               |
| Sweeting, Andrew           | University of Maryland                      |
| Swinney, Robert            | Duke University                             |
| Syam, Niladri              | University of Missouri                      |
| Sydnor, Justin             | University of Wisconsin-Madison             |
| Sytch, Maxim               | University of Michigan                      |
| Syverson, Chad             | University of Chicago                       |
| Szech, Nora                | Karlsruhe Institute of Technology           |
| Szydlowski, Martin         | University of Minnesota                     |
| Szymanowska, Marta         | Erasmus University                          |
| Tafti, Ali                 | University of Illinois at Chicago           |
| Tahbaz-Salehi, Alireza     | Columbia University                         |
| Talebian, Masoud           | University of Newcastle                     |
| Talluri, Kalyan            | Imperial College London                     |
| Talukdar, Debabrata        | University at Buffalo                       |
| Tambe, Prasanna            | New York University                         |
| Tamoni, Andrea             | London School of Economics                  |
| Tan, David                 | University of Washington                    |
| Tan, Tarkan                | Eindhoven University of Technology          |

|                      |                                                 |
|----------------------|-------------------------------------------------|
| Tan, Tom             | Southern Methodist University                   |
| Tan, Yinliang        | Tulane University                               |
| Tandon, Vivek        | National University of Singapore                |
| Tang, Dragon         | University of Hong Kong                         |
| Tang, Ke             | Renmin University                               |
| Tang, Sammi          | University of Miami                             |
| Tang, Xiaoxiao       | Washington University in St. Louis              |
| Tannenbaum, David    | University of Chicago                           |
| Tanrisever, Fehmi    | Bilkent University                              |
| Taschini, Luca       | London School of Economics                      |
| Tasoff, Joshua       | Claremont Graduate University                   |
| Tassone, Eric        | University of Virginia                          |
| Tatarynowicz, Adam   | Singapore Management University                 |
| Taubinsky, Dmitry    | Harvard University                              |
| Taylor, William      | Brigham Young University                        |
| Taylor, Daniel       | University of Pennsylvania                      |
| Taylor, Greg         | University of Oxford                            |
| Taylor, Lucian       | University of Pennsylvania                      |
| Taylor, Sean         | New York University                             |
| Tebaldi, Claudio     | Bocconi University                              |
| Teigen, Karl         | University of Oslo                              |
| Telyukova, Irina     | Intensity Corporation                           |
| Tenbrunsel, Ann      | University of Notre Dame                        |
| Teodorescu, Andrei   | Indiana University                              |
| Teodoridis, Florenta | University of Southern California               |
| Ter Meer, Janna      | University of Cologne                           |
| Tereyagoglu, Necati  | Georgia Institute of Technology                 |
| Teytelboym, Alex     | University of Oxford                            |
| Tezcan, Tolga        | London Business School                          |
| Thakor, Anjan        | Washington University in St. Louis              |
| Tham, Mandy          | Nanyang Technological University                |
| Thanassoulis, John   | University of Warwick                           |
| Thiele, Aurelie      | Lehigh University                               |
| Thoeni, Christian    | University of Lausanne                          |
| Thomadsen, Raphael   | Washington University in St. Louis              |
| Thomas, Susan        | Indira Gandhi Institute of Development Research |
| Thomas-Hunt, Melissa | University of Virginia                          |
| Thomopoulos, Dimitri | University of Bologna                           |
| Thompson, Peter      | Emory University                                |
| Thonemann, Ulrich    | University of Cologne                           |
| Thraves, Charles     | Universidad de Chile                            |
| Tian, Weidong        | University of North Carolina at Charlotte       |
| Tice, Sheri          | Tulane University                               |
| Tilcsik, Andras      | University of Toronto                           |
| Tilson, Vera         | University of Rochester                         |
| Tiu, Cristian        | University at Buffalo                           |
| Tiwana, Amrit        | University of Georgia                           |
| Toffel, Michael      | Harvard University                              |
| Toh, Puay Khoon      | University of Texas at Austin                   |

|                         |                                             |
|-------------------------|---------------------------------------------|
| Tombak, Mihkel          | University of Toronto                       |
| Tompaidis, Stathis      | University of Texas at Austin               |
| Tong, Jordan            | University of Wisconsin-Madison             |
| Tong, Qing              | Singapore Management University             |
| Tookes, Heather         | Yale University                             |
| Topaloglou, Nikolas     | Athens University of Economics and Business |
| Topaloglu, Huseyin      | Cornell University                          |
| Torelli, Carlos         | University of Minnesota                     |
| Toubia, Olivier         | Columbia University                         |
| tourre, fabrice         | University of Chicago                       |
| Townsend, Richard       | Dartmouth College                           |
| Toxvaerd, Flavio        | University of Cambridge                     |
| Tran, Ngoc-Khanh        | Washington University in St. Louis          |
| Trautmann, Stefan       | Heidelberg University                       |
| Treich, Nicolas         | University of Toulouse                      |
| Trichakis, Nikolaos     | Harvard University                          |
| Trier Damgaard, Mette   | Aarhus University                           |
| Trueblood, Jennifer     | University of California, Irvine            |
| Trujillo, Carlos        | Universidad de los Andes                    |
| Truong, Van-Anh         | Columbia University                         |
| Trusov, Michael         | University of Maryland                      |
| Tsai, Claire            | University of Toronto                       |
| Tsetlin, Ilia           | INSEAD                                      |
| Tsetsos, Konstantinos   | University of Oxford                        |
| Tsoutsoura, Margarita   | University of Chicago                       |
| Tu, Jun                 | Singapore Management University             |
| Tucker, Anita           | Brandeis University                         |
| Tucker, Catherine       | Massachusetts Institute of Technology       |
| Tucker, Jennifer        | University of Florida                       |
| Tuckfield, Bradford     | University of Pennsylvania                  |
| Tungodden, Jonas        | University of California, Berkeley          |
| Turcic, Danko           | Washington University in St. Louis          |
| Turel, Ofir             | California State University, Fullerton      |
| Turley, Ty              | Brigham Young University                    |
| Turnbull, Stuart        | University of Houston                       |
| Turut, Ozge             | Sabanci University                          |
| Tuzel, Selale           | University of Southern California           |
| Tzeng, Larry            | National Taiwan University                  |
| Ugander, Johan          | Cornell University                          |
| Uhan, Nelson            | United States Naval Academy                 |
| Uhrig-Homburg, Marliese | Karlsruhe Institute of Technology           |
| Uichanco, Joline        | University of Michigan                      |
| Ulku, Sezer             | Georgetown University                       |
| Ulrich, Maxim           | Karlsruhe Institute of Technology           |
| Ulu, Canan              | Georgetown University                       |
| Umyarov, Akhmed         | University of Minnesota                     |
| Underwood, Shane        | University of Alabama                       |
| Uotila, Juha            | University of Warwick                       |
| Uppal, Raman            | EDHEC Business School                       |

|                           |                                             |
|---------------------------|---------------------------------------------|
| Urcan, Oktay              | University of Illinois at Urbana-Champaign  |
| Urminsky, Oleg            | University of Chicago                       |
| Uysal, Vahap              | DePaul University                           |
| Vahn, Gah-Yi              | London Business School                      |
| Vakili, Keyvan            | University of Toronto                       |
| VALENTE, Giorgio          | City University of Hong Kong                |
| Valentini, Giovanni       | Bocconi University                          |
| Valkanov, Rossen          | University of California, San Diego         |
| Valletti, Tommaso         | Imperial College London                     |
| Valta, Philip             | University of Geneva                        |
| Van Bekkum, Sjoerd        | Erasmus University                          |
| Van Binsbergen, Jules     | University of Pennsylvania                  |
| van de Kuilen, Gijs       | Erasmus University                          |
| van de Rijt, Arnout       | Stony Brook University                      |
| van de Ven, Niels         | Tilburg University                          |
| Van den Bulte, Christophe | University of Pennsylvania                  |
| Van den Steen, Eric       | Harvard University                          |
| Van der Heijden, Eline    | Tilburg University                          |
| van der Klaauw, Bas       | Vrije Universiteit Amsterdam                |
| van der Putten, Marijke   | Leiden University                           |
| Van Heerde, Harald        | Massey University                           |
| van Horen, Neltje         | De Nederlandsche Bank                       |
| van Leeuwen, Johan        | Eindhoven University of Technology          |
| Van Parys, Bart           | ETH Zurich                                  |
| van Praag, Mirjam         | Copenhagen Business School                  |
| Van Rooij, Maarten        | Dutch Central Bank                          |
| Vanasco, Victoria         | Stanford University                         |
| Vanneste, Bart            | University College London                   |
| Varas, Felipe             | Duke University                             |
| Vasi, Ion Bogdan          | University of Iowa                          |
| Vasnev, Andrey            | University of Sydney                        |
| Vasvari, Florin           | London Business School                      |
| Vayanos, Phebe            | Massachusetts Institute of Technology       |
| Vedolin, Andrea           | London School of Economics                  |
| Veeravalli, Venugopal     | University of Illinois at Urbana-Champaign  |
| Velikov, Mihail           | Federal Reserve Bank of Richmond            |
| Venkataraman, Kumar       | Southern Methodist University               |
| Venkataraman, Sriram      | University of North Carolina at Chapel Hill |
| venkataramani, vijaya     | University of Maryland                      |
| Venkatesh, R              | University of Pittsburgh                    |
| Veraart, Luitgard         | London School of Economics                  |
| Verardo, Michela          | London School of Economics                  |
| Verdi, Rodrigo            | Massachusetts Institute of Technology       |
| Vergne, Jean-Philippe     | University of Western Ontario               |
| verhoeven, dennis         | Katholieke Universiteit Leuven              |
| Vermeulen, Freek          | London Business School                      |
| Vest, Joshua              | Cornell University                          |
| Vesterlund, Lise          | University of Pittsburgh                    |
| Viard, V.                 | Cheung Kong Graduate School of Business     |

|                              |                                            |
|------------------------------|--------------------------------------------|
| Vicente, Sergio              | Universidad Carlos III de Madrid           |
| Vieider, Ferdinand           | Ludwig Maximilian University of Munich     |
| Vilkov, Grigory              | Frankfurt School of Finance and Management |
| Villalonga, Belen            | New York University                        |
| Villeneuve, Stephane         | Toulouse School of Economics               |
| Villumsen, Jonas Christoffer | Hitachi                                    |
| Virag, Gabor                 | University of Toronto                      |
| Viscusi, Kip                 | Vanderbilt University                      |
| Viswanathan, S.              | Duke University                            |
| Viswanathan, Siva            | University of Maryland                     |
| Vitorino, Maria Ana          | University of Minnesota                    |
| Vladimirov, Vladimir         | University of Amsterdam                    |
| Volpin, Paolo                | City University London                     |
| von Essen, Emma              | Aarhus University                          |
| von Nordenflycht, Andrew     | Simon Fraser University                    |
| von Siemens, Ferdinand       | University of Frankfurt                    |
| Vondrak, Jan                 | IBM Almaden                                |
| Vorkink, Keith               | Brigham Young University                   |
| Vorsatz, Marc                | Fundación de Estudios de Economía Aplicada |
| Vosgerau, Joachim            | Bocconi University                         |
| Vroom, Govert                | IESE Business School                       |
| Vuilleme, Guillaume          | HEC Paris                                  |
| Vul, Ed                      | University of California, San Diego        |
| Vulcano, Gustavo             | New York University                        |
| Vyas, Dushyant               | University of Toronto                      |
| Wachter, Jessica             | University of Pennsylvania                 |
| Wagenhofer, Alfred           | University of Graz                         |
| Wagner, Michael              | University of Washington                   |
| Wagner, Niklas               | University of Passau                       |
| Waguespack, David            | University of Maryland                     |
| Wahid, Aida                  | University of Toronto                      |
| Wakker, Peter                | Erasmus University                         |
| Wakslak, Cheryl              | University of Southern California          |
| Walasek, Lukasz              | University of Warwick                      |
| Waldinger, Fabian            | University of Warwick                      |
| Walker, Dylan                | Boston University                          |
| Wallis, Kenneth              | University of Warwick                      |
| Wan, Guohua                  | Shanghai Jiao Tong University              |
| Wan, Zhixi                   | University of Oregon                       |
| Wang, Baolian                | Fordham University                         |
| Wang, Charles                | Harvard University                         |
| Wang, Chong                  | City University of Hong Kong               |
| Wang, Clare                  | Northwestern University                    |
| Wang, Fangfang               | University of Illinois at Chicago          |
| Wang, Huijun                 | University of Delaware                     |
| Wang, Jianxin                | Central South University                   |
| Wang, Jin                    | Wilfrid Laurier University                 |
| Wang, Jingqi                 | University of Hong Kong                    |
| Wang, Kangkang               | University of Alberta                      |

|                    |                                                |
|--------------------|------------------------------------------------|
| Wang, Qiong        | University of Illinois at Urbana-Champaign     |
| Wang, Richard      | Babson College                                 |
| Wang, Ruxian       | Johns Hopkins University                       |
| Wang, Shouqiang    | Clemson University                             |
| Wang, Tong         | National University of Singapore               |
| Wang, Tracy        | University of Minnesota                        |
| Wang, Wenyu        | Indiana University                             |
| Wang, Xue          | The Ohio State University                      |
| Wang, Yajun        | University of Maryland                         |
| Wang, Yan          | Erasmus University                             |
| Wang, Yimin        | Arizona State University                       |
| Wang, Yongxiang    | University of Southern California              |
| Wang, Zhenyu       | Indiana University                             |
| Wang, Zhi Jay      | University of Oregon                           |
| Wang, Zizhuo       | University of Minnesota                        |
| Ward, Amy          | University of Southern California              |
| Watanabe, Akiko    | University of Alberta                          |
| Watanabe, Masahiro | Rice University                                |
| Wathieu, Luc       | Georgetown University                          |
| Wattal, Sunil      | Temple University                              |
| Watts, Susan       | Purdue University                              |
| Weaver, Connie     | Texas A&M University                           |
| Weber, Martin      | University of Mannheim                         |
| Weber, Stefan      | Leibniz University of Hanover                  |
| Webster, Scott     | Arizona State University                       |
| Wedell, Douglas    | University of South Carolina                   |
| Wei, Bin           | Federal Reserve Bank of Atlanta                |
| Wei, K.C. John     | Hong Kong University of Science and Technology |
| Wei, Kelsey        | University of Texas at Dallas                  |
| Wei, Yehua         | Massachusetts Institute of Technology          |
| Weinbaum, David    | Syracuse University                            |
| Weinstein, Milton  | Harvard University                             |
| Weintraub, Gabriel | Columbia University                            |
| Wei, Arne         | University of Cologne                          |
| Weiss, Dan         | Tel Aviv University                            |
| Weng, Xi           | Peking University                              |
| Wengstrm, Erik    | Lund University                                |
| Wermers, Russ      | University of Maryland                         |
| Werner, Peter      | University of Cologne                          |
| Westerfield, Mark  | University of Southern California              |
| Whaley, Robert     | Vanderbilt University                          |
| Wheeler, Christian | Stanford University                            |
| Whelan, Paul       | Imperial College London                        |
| White, Alexander   | Tsinghua University                            |
| White, Hal         | Pennsylvania State University                  |
| Whitt, Ward        | Columbia University                            |
| Wibral, Matthias   | University of Bonn                             |
| Widener, Sally     | Clemson University                             |
| Wiersma, Eelke     | Free University Amsterdam                      |

|                            |                                                |
|----------------------------|------------------------------------------------|
| Wiesemann, Wolfram         | Imperial College London                        |
| Wilbur, Kenneth            | University of California, San Diego            |
| Wildenbeest, Matthijs      | Indiana University                             |
| Willenborg, Michael        | University of Connecticut                      |
| Williams, Basil            | New York University                            |
| Williams, Jared            | Pennsylvania State University                  |
| Williams, Jonathan         | University of Georgia                          |
| Williams, Ryan             | University of Arizona                          |
| Williamson, Rohan          | Georgetown University                          |
| Willis, Richard            | Vanderbilt University                          |
| Wilson, Mungo              | Oxford University                              |
| Wiltermuth, Scott          | University of Southern California              |
| Winter, Joachim            | University of Munich                           |
| Winter, Ralph              | University of British Columbia                 |
| Wittenberg-Moerman, Regina | University of Southern California              |
| Wolfe, Brian               | University at Buffalo                          |
| Wong, M.H. Franco          | University of Toronto                          |
| Woolley, Anita             | Carnegie Mellon University                     |
| Wooten, Joel               | University of South Carolina                   |
| Workiewicz, Maciej         | INSEAD                                         |
| Wozabal, David             | University of Vienna                           |
| Wozniak, David             | Eastern Michigan University                    |
| Wright, Brian              | University of California, Berkeley             |
| Wu, Brian                  | University of Michigan                         |
| Wu, Chunhua                | University of British Columbia                 |
| Wu, Deming                 | Office of the Comptroller of the Currency      |
| Wu, George                 | University of Chicago                          |
| Wu, Jiabin                 | University of Oregon                           |
| Wu, Jianqing               | University of Washington                       |
| Wu, Jin                    | University of Georgia                          |
| Wu, Liuren                 | Baruch College                                 |
| Wu, Lixin                  | Hong Kong University of Science and Technology |
| Wu, Lynn                   | University of Pennsylvania                     |
| Wu, Martin                 | University of Illinois at Urbana-Champaign     |
| Wu, Owen                   | Indiana University                             |
| Wu, Qi                     | Case Western Reserve University                |
| Wu, Xiaole                 | Fudan University                               |
| Wu, Yanhui                 | University of Southern California              |
| Wu, Yaozhong               | National University of Singapore               |
| Wu, Youchang               | University of Wisconsin-Madison                |
| Wulf, Julie                | Harvard University                             |
| Wysocki, Peter             | University of Miami                            |
| Xia, Han                   | University of Texas at Dallas                  |
| Xiao, Erte                 | Monash University                              |
| Xiao, Kairong              | University of British Columbia                 |
| Xiao, Ping                 | National University of Singapore               |
| Xiao, Steven               | University of Texas at Dallas                  |
| Xiao, Wenqiang             | New York University                            |
| Xie, Fei                   | Clemson University                             |

|                        |                                                |
|------------------------|------------------------------------------------|
| Xin, Linwei            | University of Illinois at Urbana-Champaign     |
| Xin, Mingdi            | University of California, Irvine               |
| Xin, Zou               | National University of Singapore               |
| Xiong, Guiyang         | University of Georgia                          |
| Xiong, Wei             | Princeton University                           |
| Xiu, Dacheng           | University of Chicago                          |
| Xu, Dachuan            | Beijing University of Technology               |
| Xu, Hong               | Hong Kong University of Science and Technology |
| Xu, Huan               | National University of Singapore               |
| Xu, Huifu              | University of Southampton                      |
| Xu, Jin                | Virginia Tech                                  |
| Xu, Jingjun            | Wichita State University                       |
| Xu, Lai                | Syracuse University                            |
| Xu, Linli              | University of Minnesota                        |
| Xu, Lizhen             | Georgia Institute of Technology                |
| Xu, Qiping             | University of Notre Dame                       |
| Xu, Ting               | University of British Columbia                 |
| Xu, Yexiao             | University of Texas at Dallas                  |
| Xu, Yi                 | University of Maryland                         |
| Xu, Yuewu              | Fordham University                             |
| Xu, Yunjian            | Singapore University of Technology and Design  |
| Xuan, Yuhai            | University of Illinois at Urbana-Champaign     |
| Xue, Ling              | Georgia State University                       |
| Yakubovich, Valery     | ESSEC                                          |
| Yalcin, Taylan         | Argyros School of Business and Economics       |
| Yan, An                | Fordham University                             |
| Yan, Hongjun           | Yale University                                |
| Yan, Xuemin (Sterling) | University of Missouri                         |
| Yang, Baozhong         | Georgia State University                       |
| Yang, Holly            | Singapore Management University                |
| Yang, Jian             | New Jersey Institute of Technology             |
| Yang, Jun              | Bank of Canada                                 |
| Yang, Liyan            | University of Toronto                          |
| Yang, Ming             | Duke University                                |
| Yang, Mochen           | University of Minnesota                        |
| Yang, Nathan           | McGill University                              |
| Yang, S. Alex          | London Business School                         |
| Yang, Sha              | University of Southern California              |
| Yang, Wei              | Indiana University                             |
| Yang, Xuwei            | Nanjing University                             |
| Yang, Zhibin (Ben)     | University of Oregon                           |
| Yao, Song              | Northwestern University                        |
| Yao, Yuliang           | Lehigh University                              |
| Yasuda, Ayako          | University of California, Davis                |
| Yavuz, M. Deniz        | Purdue University                              |
| Ye, Han                | University of Illinois at Urbana-Champaign     |
| Ye, Lixin              | The Ohio State University                      |
| Ye, Mao                | University of Illinois at Urbana-Champaign     |
| Ye, Shengqi            | Indiana University                             |

|                        |                                                |
|------------------------|------------------------------------------------|
| Ye, Xiaoxia            | Stockholm University                           |
| Yenkey, Christopher    | University of Chicago                          |
| Yerramilli, Vijay      | University of Houston                          |
| Yilankaya, Okan        | Koç University                                 |
| Yildirim, Pinar        | University of Pennsylvania                     |
| Yildizhan, Celim       | University of Georgia                          |
| Yin, Chengdong         | Purdue University                              |
| Yin, Dezhi             | University of Missouri                         |
| Yin, Pai-Ling          | Massachusetts Institute of Technology          |
| Yin, Shuya             | University of California, Irvine               |
| Yin, Xiaoli            | Baruch College                                 |
| Yoganarasimhan, Hema   | University of Washington                       |
| Yohn, Teri             | Indiana University                             |
| Yonker, Scott          | Cornell University                             |
| Yoon, Haewon           | Boston University                              |
| Yorulmazer, Tanju      | University of Amsterdam                        |
| You, Haifeng           | Hong Kong University of Science and Technology |
| Young, Rick            | The Ohio State University                      |
| Young, Steven          | Lancaster University                           |
| Yu, Fan                | Claremont McKenna College                      |
| Yu, Frank              | China European International Business School   |
| Yu, Jialin             | Hong Kong University of Science and Technology |
| Yu, Jianfeng           | University of Minnesota                        |
| Yu, Man                | Hong Kong University of Science and Technology |
| Yu, Qiuping            | Indiana University                             |
| Yu, Sandy              | University of California, Berkeley             |
| Yuan, Hong             | University of Oregon                           |
| Yuan, Kathy            | London School of Economics                     |
| Yucel, Safak           | Duke University                                |
| Yue, Qingyuan(Lori)    | University of Southern California              |
| Yueshen , Bart         | INSEAD                                         |
| Yuksel, Sevgi          | New York University                            |
| Yun, Hayong            | Michigan State University                      |
| Zabojnik, Jan          | Queen's University                             |
| Zach, Tzachi           | The Ohio State University                      |
| Zafar, Basit           | Federal Reserve Bank of New York               |
| Zakoian, Jean-Michel   | CREST                                          |
| Zanarone, Giorgio      | Colegio Universitario de Estudios Financieros  |
| Zariphopoulou, Thaleia | University of Texas at Austin                  |
| Zarowin, Paul          | New York University                            |
| Zarutskie, Rebecca     | Federal Reserve Bank                           |
| Zawadowski, Adam       | Boston University                              |
| Zbaracki, Mark         | University of Western Ontario                  |
| Zechman, Sarah         | University of Chicago                          |
| Zehnder, Christian     | University of Lausanne                         |
| Zeiler, Kathryn        | Georgetown University                          |
| Zeisberger, Stefan     | University of Zurich                           |
| Zeithammer, Robert     | University of California, Los Angeles          |
| Zeltyn, Sergey         | IBM                                            |

|                        |                                                |
|------------------------|------------------------------------------------|
| Zender, Jaime          | University of Colorado                         |
| Zeng, Yao              | Harvard University                             |
| Zenger, Todd           | University of Utah                             |
| Zentner, Alejandro     | University of Texas at Dallas                  |
| Zervas, Georgios       | Boston University                              |
| Zhang, Bohui           | University of New South Wales                  |
| Zhang, Chu             | Hong Kong University of Science and Technology |
| Zhang, Dan             | University of Colorado at Boulder              |
| Zhang, Dennis (Jiajun) | Northwestern University                        |
| Zhang, Fuqiang         | Washington University in St. Louis             |
| Zhang, Haiwen          | The Ohio State University                      |
| Zhang, Hanjiang        | Nanyang Technological University               |
| Zhang, Hanqin          | National University of Singapore               |
| Zhang, Hao             | University of British Columbia                 |
| Zhang, Harold          | University of Texas at Dallas                  |
| Zhang, Hongtao         | Hong Kong University of Science and Technology |
| Zhang, Jiawei          | New York University                            |
| Zhang, Jieying         | University of Texas at Dallas                  |
| Zhang, Jiheng          | Hong Kong University of Science and Technology |
| Zhang, Jinfan          | Cheung Kong Graduate School of Business        |
| Zhang, Juanjuan        | Massachusetts Institute of Technology          |
| Zhang, Kaifu           | Carnegie Mellon University                     |
| Zhang, Mindy Xiaolan   | University of Texas at Austin                  |
| Zhang, Rachel          | Hong Kong University of Science and Technology |
| Zhang, Renyu           | Washington University in St. Louis             |
| Zhang, Tianyu          | Chinese University of Hong Kong                |
| Zhang, Weina           | National University of Singapore               |
| Zhang, Xiaobo          | International Food Policy Research Institute   |
| Zhang, Xiaojun         | Hong Kong University of Science and Technology |
| Zhang, Xubing          | Hong Kong Polytechnic University               |
| Zhang, Yinghao         | Salisbury University                           |
| Zhang, Yinglei         | Chinese University of Hong Kong                |
| Zhang, Yong            | Hong Kong Polytechnic University               |
| Zhang, Yuchi           | Temple University                              |
| Zhang, Zhong-Yuan      | Central University of Finance and Economics    |
| Zhang, Zhu             | Iowa State University                          |
| Zhao, Huimin           | University of Wisconsin-Milwaukee              |
| Zhao, Kang             | University of Iowa                             |
| Zhao, Lin              | Chinese Academy of Sciences                    |
| Zhao, Minyuan          | University of Pennsylvania                     |
| Zhao, Wenhui           | Shanghai Jiao Tong University                  |
| Zhao, Xiaofei          | University of Texas at Dallas                  |
| Zhao, Xuan             | Wilfrid Laurier University                     |
| Zhao, Xuying           | University of Notre Dame                       |
| Zhao, Yao              | Rutgers University                             |
| Zhdanov, Alexei        | Pennsylvania State University                  |
| Zheng, Eric            | University of Texas at Dallas                  |
| Zheng, Huan            | Shanghai Jiao Tong University                  |
| Zheng, Kai             | University of Michigan                         |

|                     |                                             |
|---------------------|---------------------------------------------|
| Zheng, Lu           | University of California, Irvine            |
| Zheng, Yanchong     | Massachusetts Institute of Technology       |
| Zheng, Zhichao      | Singapore Management University             |
| Zhong, Hongda       | London School of Economics                  |
| Zhong, Yuan         | Columbia University                         |
| Zhong, Zhuo         | University of Melbourne                     |
| Zhou, Bobby         | University of Maryland                      |
| Zhou, Dexin         | Emory University                            |
| Zhou, Guofu         | Washington University in St. Louis          |
| Zhou, Jidong        | New York University                         |
| Zhou, Jing          | University of North Carolina at Charlotte   |
| Zhou, Maggie        | University of Michigan                      |
| Zhou, Sean          | Chinese University of Hong Kong             |
| Zhou, Xing          | Rutgers University                          |
| Zhou, Yuan          | Massachusetts Institute of Technology       |
| Zhu, Feng           | Harvard University                          |
| Zhu, Haoxiang       | Massachusetts Institute of Technology       |
| Zhu, Hwanyi         | University of Toronto                       |
| Zhu, John           | University of Pennsylvania                  |
| Zhu, Ting           | University of British Columbia              |
| Zhu, Wanshan        | Tsinghua University                         |
| Zhu, Yi             | University of Minnesota                     |
| Zhuang, Jun         | University at Buffalo                       |
| Ziedonis, Rosemarie | Boston University                           |
| Zieglmeyer, Anthony | Queen's University                          |
| Zimmermann, Florian | University of Zurich                        |
| Zitzewitz, Eric     | Dartmouth College                           |
| Ziya, Serhan        | University of North Carolina at Chapel Hill |
| Zoroa, Noemi        | University of Murcia                        |
| Zou, Hong           | University of Hong Kong                     |
| Zubcsek, Peter Pal  | University of Florida                       |
| Zuckerberg, Mark    | BHP Billiton                                |
| Zuo, Luo            | Cornell University                          |
| Zusai, Dai          | Temple University                           |
| Zuzul, Tiona        | London Business School                      |
